# Supplementary material for: A cyclopeptide and three oligomycin-class polyketides produced by an underexplored actinomycete of the genus Pseudosporangium
Source: publisher site journal article supplement (doi:10.3762/bjoc.16.97), 2020-05-25
Supplement: Additional file 1 [file 1860-5397-16-97-S1.pdf]

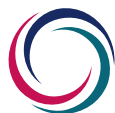

## Supporting Information

for

### **A cyclopeptide and three oligomycin-class polyketides produced by an underexplored actinomycete of the genus *Pseudosporangium***

Shun Saito, Kota Atsumi, Tao Zhou, Keisuke Fukaya, Daisuke Urabe, Naoya Oku, Md. Rokon Ul Karim, Hisayuki Komaki and Yasuhiro Igarashi

*Beilstein J. Org. Chem.* **2020**, *16*, 1100–1110. doi:10.3762/bjoc.16.97

## Copies of NMR spectra for compounds 1–4



## Table of contents

|                                                                                                                                                   |     |
|---------------------------------------------------------------------------------------------------------------------------------------------------|-----|
| <b>Figure S1.</b> $^1\text{H}$ NMR spectrum of pseudosporamide ( <b>1</b> ) (500 MHz, $\text{DMSO-}d_6$ )                                         | S3  |
| <b>Figure S2.</b> $^{13}\text{C}$ NMR spectrum of <b>1</b> (125 MHz, $\text{DMSO-}d_6$ )                                                          | S4  |
| <b>Figure S3.</b> DEPT135 spectrum of <b>1</b> (125 MHz, $\text{DMSO-}d_6$ )                                                                      | S5  |
| <b>Figure S4.</b> $^1\text{H-}^1\text{H}$ COSY spectrum of <b>1</b> (500 MHz, $\text{DMSO-}d_6$ )                                                 | S6  |
| <b>Figure S5.</b> HSQC spectrum of <b>1</b> (500 MHz, $\text{DMSO-}d_6$ )                                                                         | S7  |
| <b>Figure S6.</b> HMBC spectrum of <b>1</b> (500 MHz, $\text{DMSO-}d_6$ )                                                                         | S8  |
| <b>Figure S7.</b> ROESY spectrum of <b>1</b> (500 MHz, $\text{DMSO-}d_6$ )                                                                        | S9  |
| <b>Figure S8.</b> HPLC chromatogram of hydrolysate from <b>1</b> and comparison to standard amino acids, derivatized with Marfey's reagent (FDLA) | S10 |
| <b>Figure S9.</b> $^1\text{H}$ NMR spectrum of <b>5a</b> (500 MHz, $\text{DMSO-}d_6$ )                                                            | S11 |
| <b>Figure S10.</b> $^1\text{H-}^1\text{H}$ COSY spectrum of <b>5a</b> (500 MHz, $\text{DMSO-}d_6$ )                                               | S12 |
| <b>Figure S11.</b> $^1\text{H}$ NMR spectrum of <b>5b</b> (500 MHz, $\text{DMSO-}d_6$ )                                                           | S13 |
| <b>Figure S12.</b> $^1\text{H-}^1\text{H}$ COSY spectrum of <b>5b</b> (500 MHz, $\text{DMSO-}d_6$ )                                               | S14 |
| <b>Figure S13.</b> $^1\text{H}$ NMR spectrum of pseudosporamicin A ( <b>2</b> ) (500 MHz, $\text{CDCl}_3$ )                                       | S15 |
| <b>Figure S14.</b> $^{13}\text{C}$ NMR spectrum of <b>2</b> (125 MHz, $\text{CDCl}_3$ )                                                           | S16 |
| <b>Figure S15.</b> $^1\text{H-}^1\text{H}$ COSY spectrum of <b>2</b> (500 MHz, $\text{CDCl}_3$ )                                                  | S17 |
| <b>Figure S16.</b> HSQC spectrum of <b>2</b> (500 MHz, $\text{CDCl}_3$ )                                                                          | S18 |
| <b>Figure S17.</b> HMBC spectrum of <b>2</b> (500 MHz, $\text{CDCl}_3$ )                                                                          | S19 |
| <b>Figure S18.</b> NOESY spectrum of <b>2</b> (500 MHz, $\text{CDCl}_3$ )                                                                         | S20 |
| <b>Figure S19.</b> $^1\text{H}$ NMR spectrum of pseudosporamicin B ( <b>3</b> ) (500 MHz, $\text{CDCl}_3$ )                                       | S21 |
| <b>Figure S20.</b> $^{13}\text{C}$ NMR spectrum of <b>3</b> (125 MHz, $\text{CDCl}_3$ )                                                           | S22 |
| <b>Figure S21.</b> $^1\text{H-}^1\text{H}$ COSY spectrum of <b>3</b> (500 MHz, $\text{CDCl}_3$ )                                                  | S23 |
| <b>Figure S22.</b> HSQC spectrum of <b>3</b> (500 MHz, $\text{CDCl}_3$ )                                                                          | S24 |
| <b>Figure S23.</b> HMBC spectrum of <b>3</b> (500 MHz, $\text{CDCl}_3$ )                                                                          | S25 |
| <b>Figure S24.</b> NOESY spectrum of <b>3</b> (500 MHz, $\text{CDCl}_3$ )                                                                         | S26 |
| <b>Figure S25.</b> $^1\text{H}$ NMR spectrum of pseudosporamicin C ( <b>4</b> ) (500 MHz, $\text{CDCl}_3$ )                                       | S27 |
| <b>Figure S26.</b> $^{13}\text{C}$ NMR spectrum of <b>4</b> (125 MHz, $\text{CDCl}_3$ )                                                           | S28 |
| <b>Figure S27.</b> $^1\text{H-}^1\text{H}$ COSY spectrum of <b>4</b> (500 MHz, $\text{CDCl}_3$ )                                                  | S29 |
| <b>Figure S28.</b> HSQC spectrum of <b>4</b> (500 MHz, $\text{CDCl}_3$ )                                                                          | S30 |
| <b>Figure S29.</b> HMBC spectrum of <b>4</b> (500 MHz, $\text{CDCl}_3$ )                                                                          | S31 |
| <b>Figure S30.</b> NOESY spectrum of <b>4</b> (500 MHz, $\text{CDCl}_3$ )                                                                         | S32 |
| <b>Figure S31.</b> COSY, key HMBC and NOESY correlations of <b>3</b> and <b>4</b>                                                                 | S33 |



**Figure S1.**  $^1\text{H}$  NMR spectrum of pseudosporamide (**1**) (500 MHz,  $\text{DMSO}-d_6$ ).

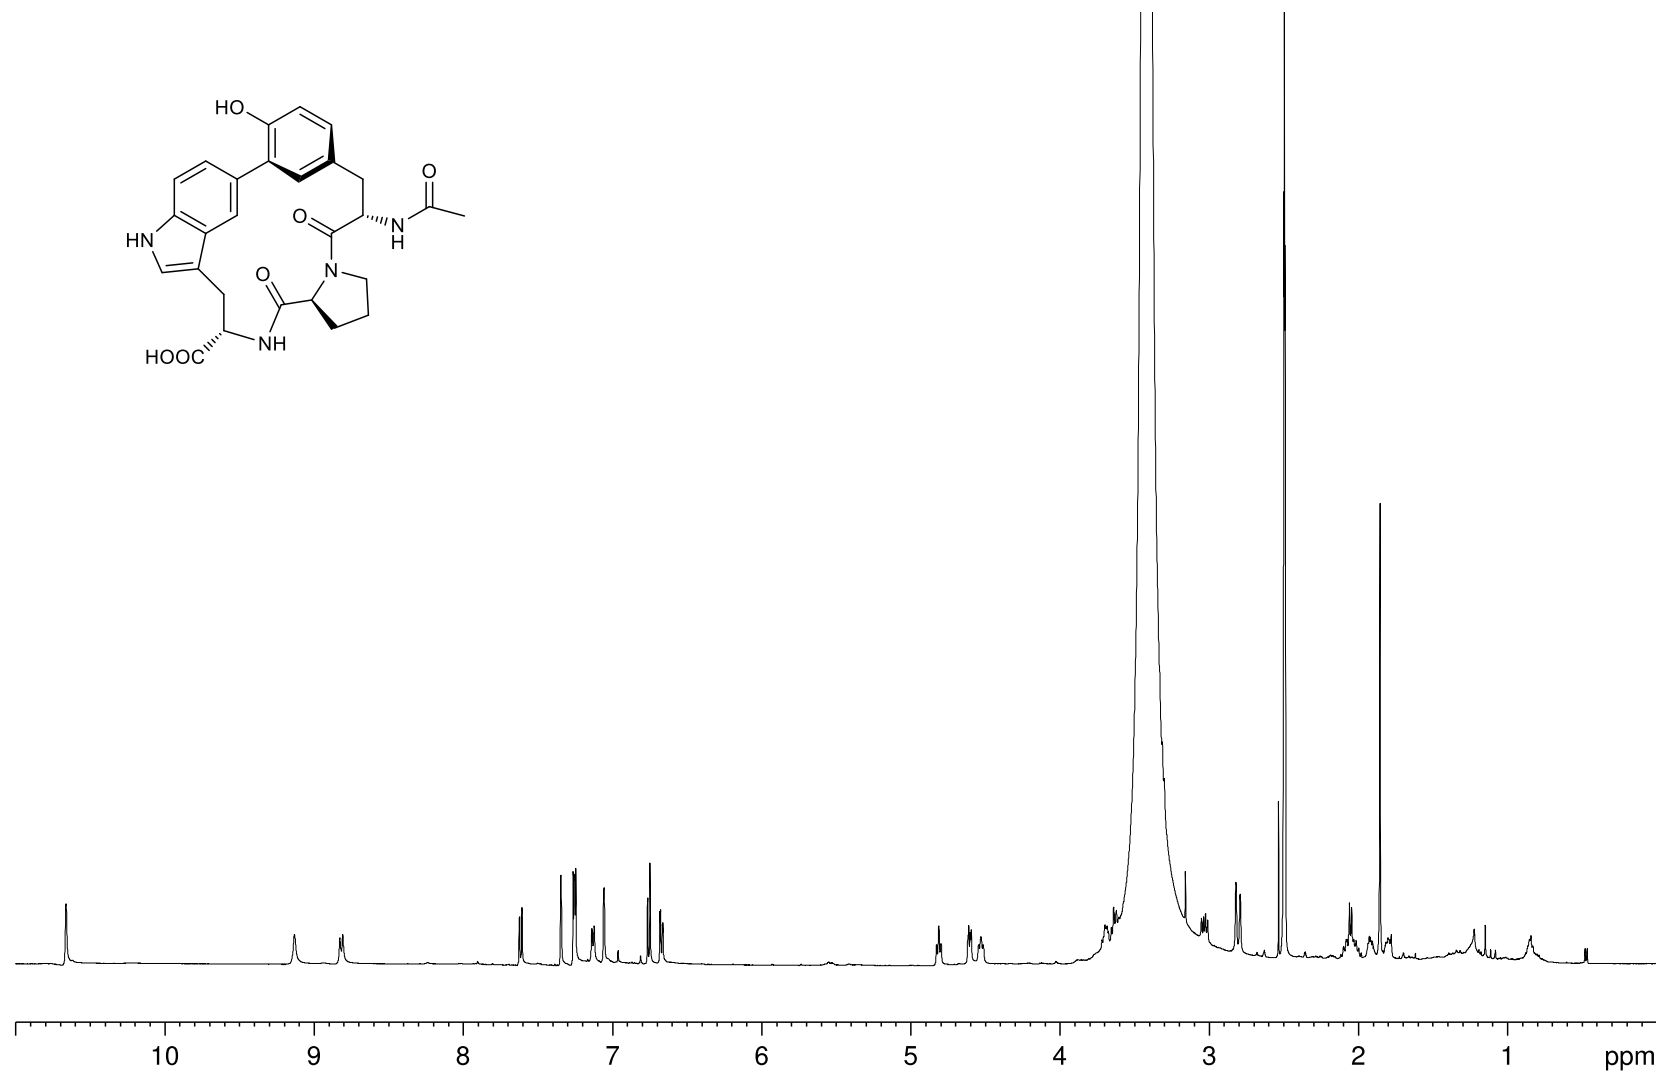



**Figure S2.**  $^{13}\text{C}$  NMR spectrum of **1** (125 MHz,  $\text{DMSO-}d_6$ ).

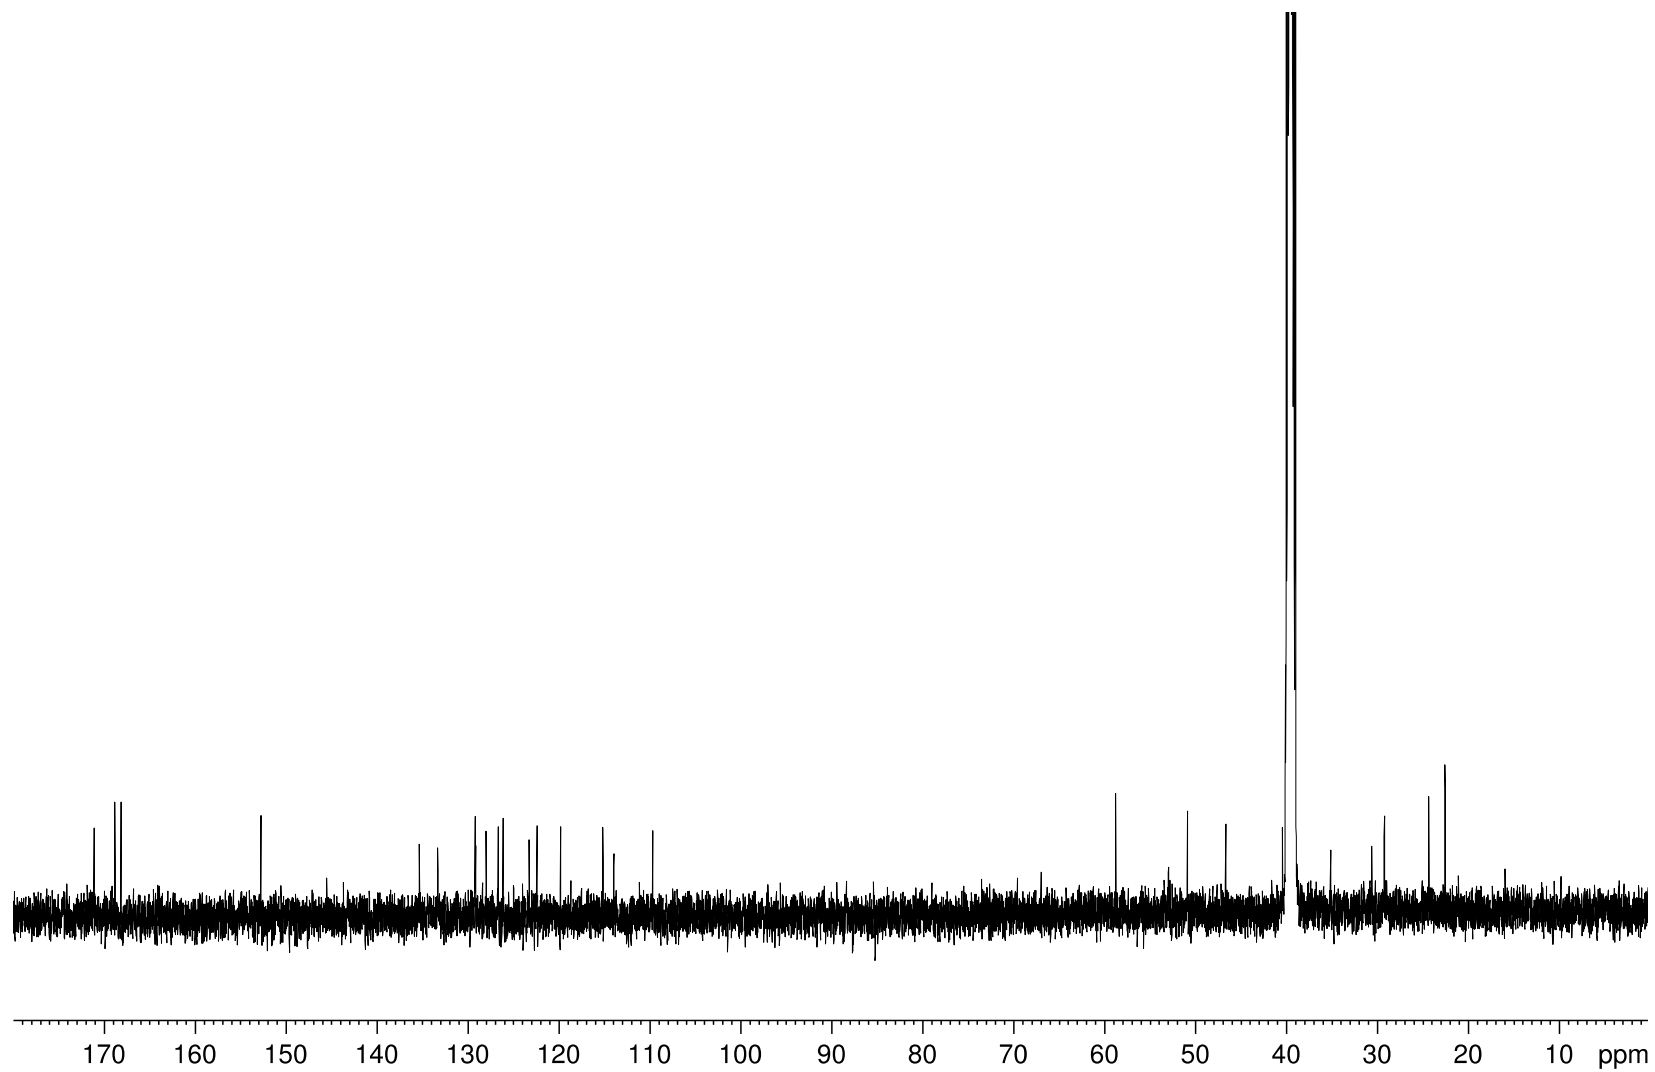



**Figure S3.** DEPT135 spectrum of **1** (125 MHz, DMSO- $d_6$ ).

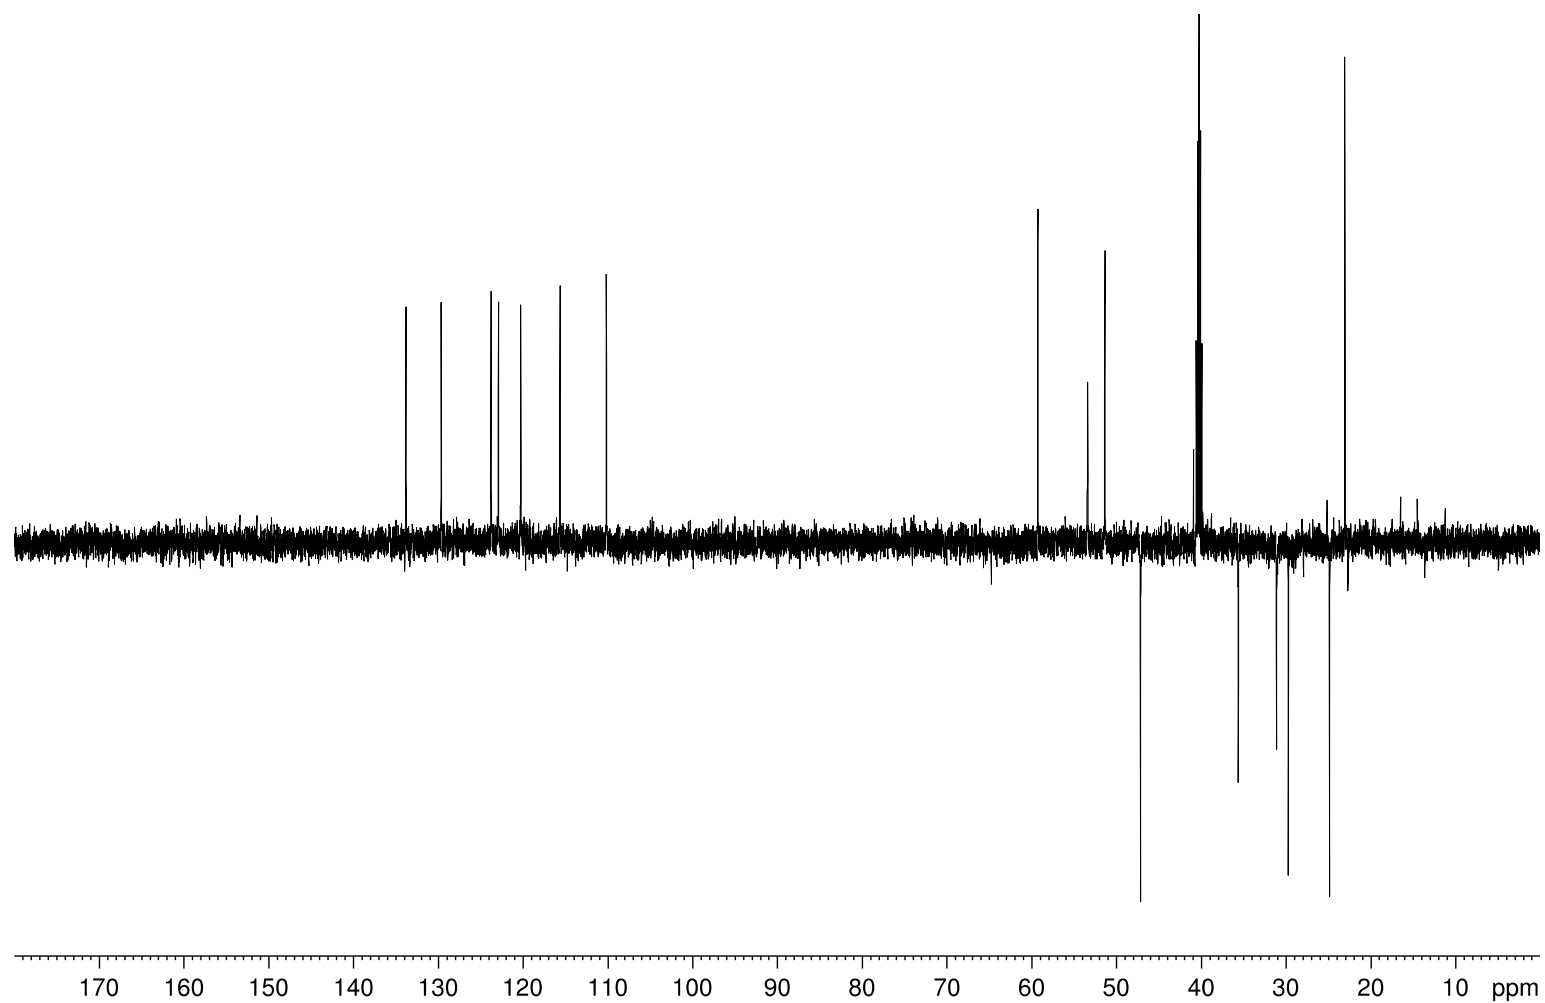



**Figure S4.**  $^1\text{H}$ - $^1\text{H}$  COSY spectrum of **1** (500 MHz,  $\text{DMSO-}d_6$ ).

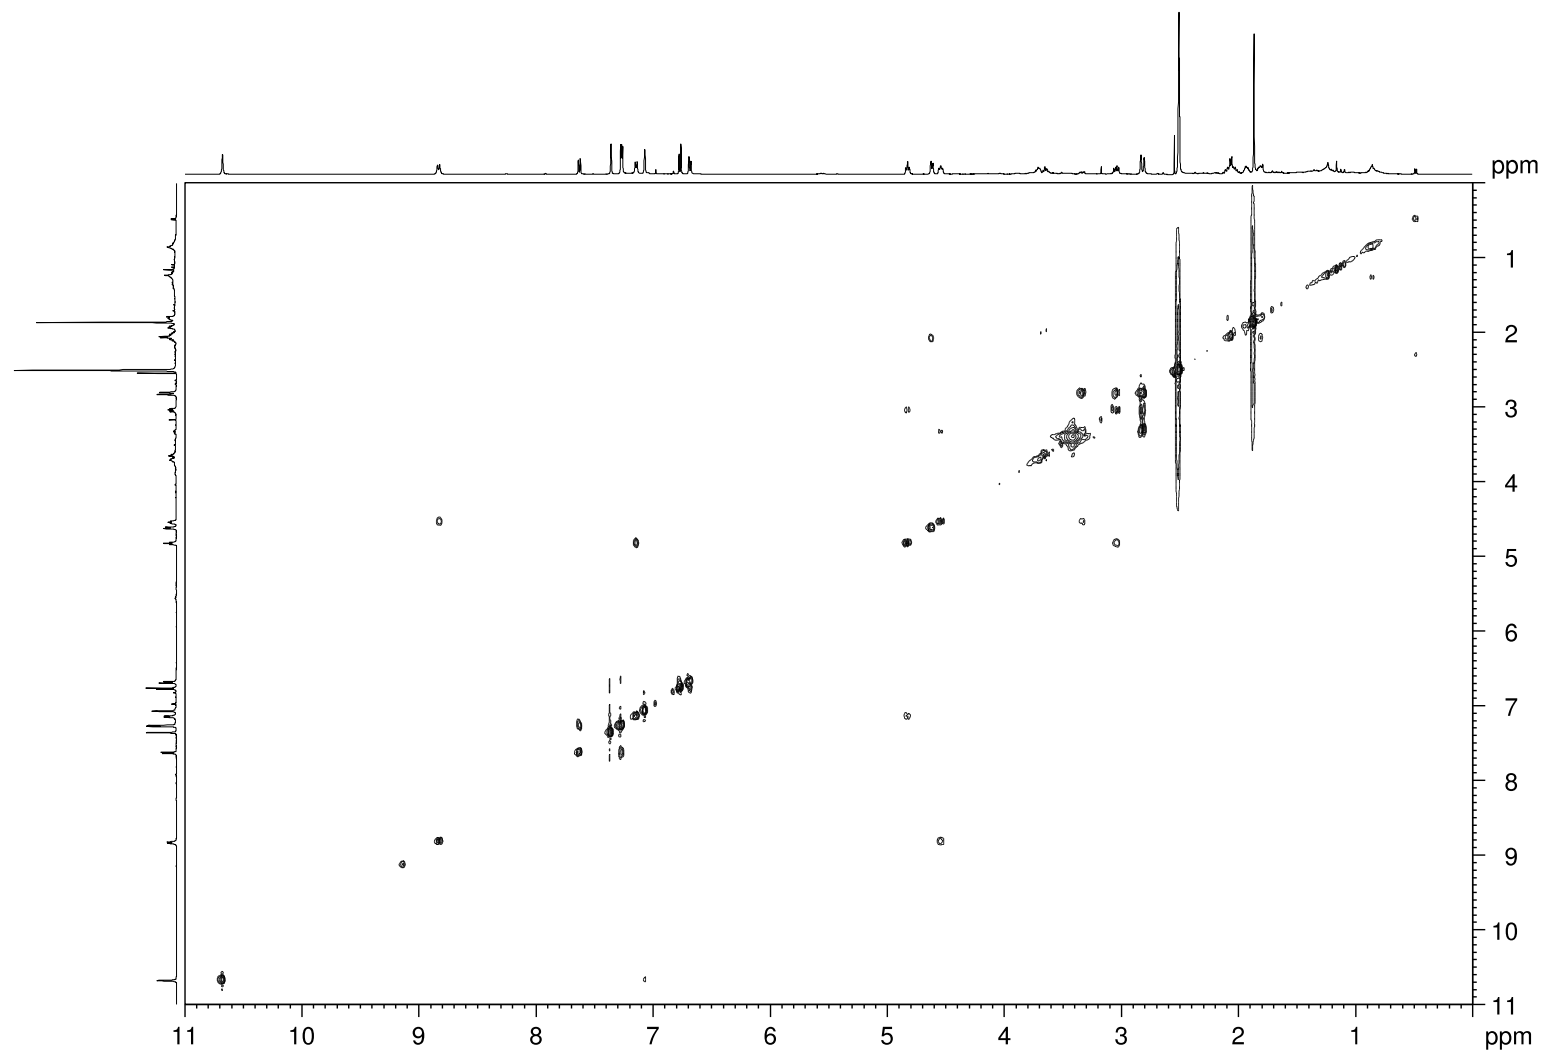



**Figure S5.** HSQC spectrum of **1** (500 MHz, DMSO- $d_6$ ).

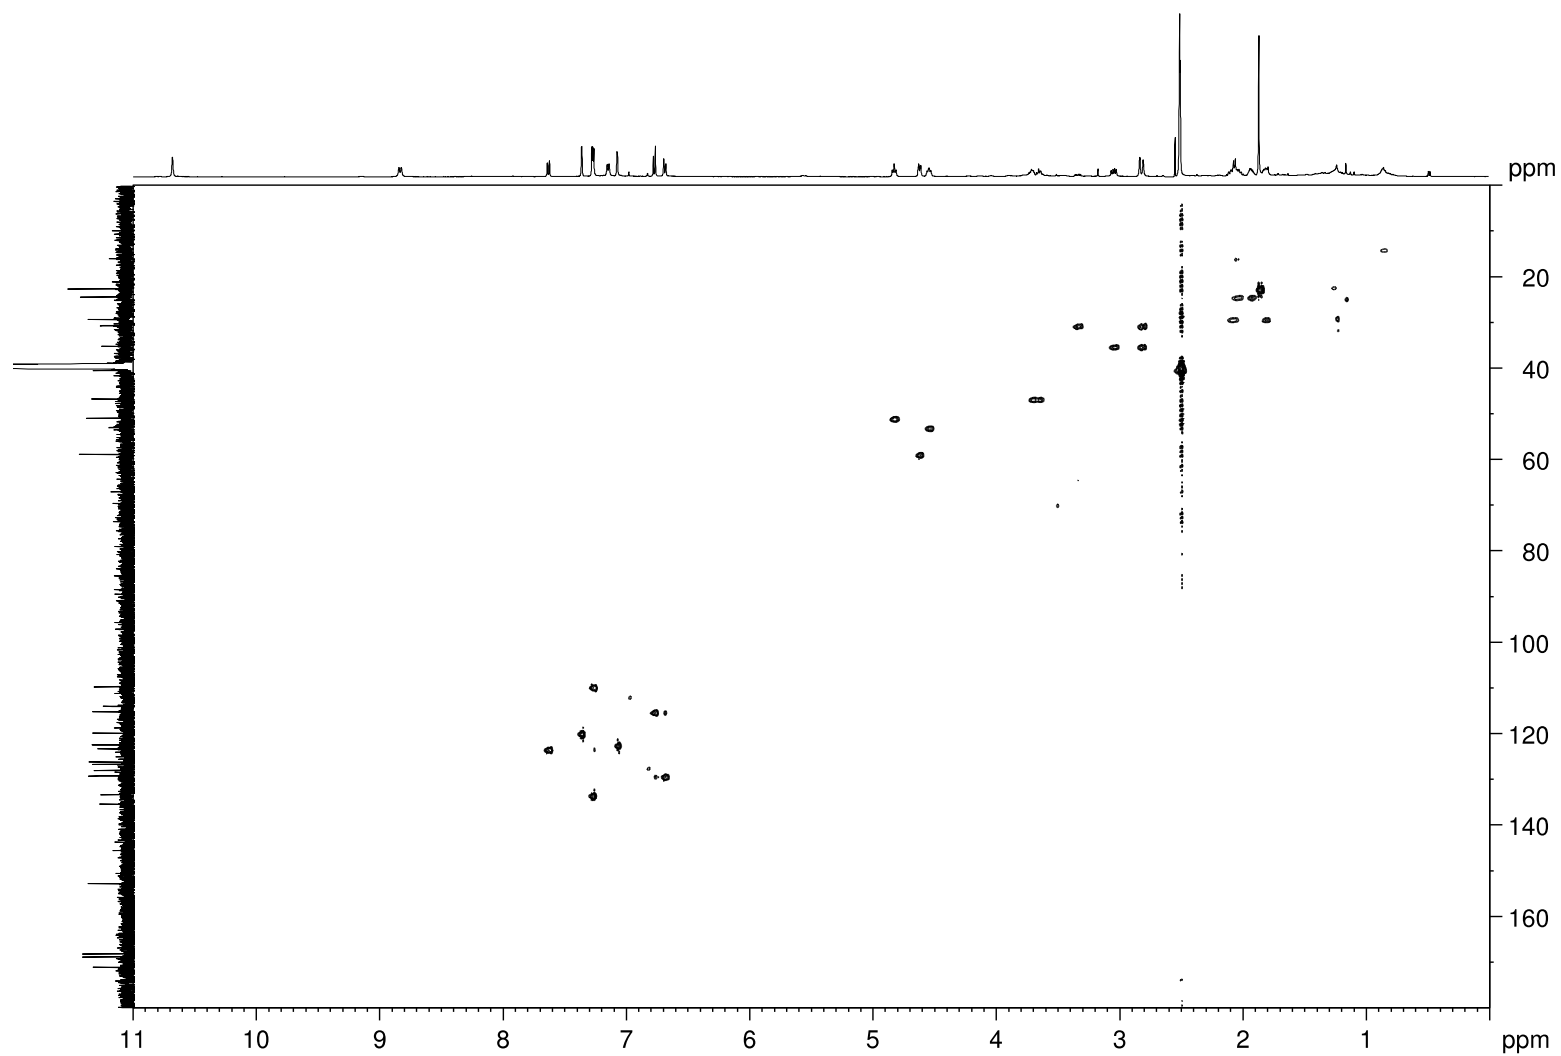



**Figure S6.** HMBC spectrum of **1** (500 MHz, DMSO- $d_6$ ).

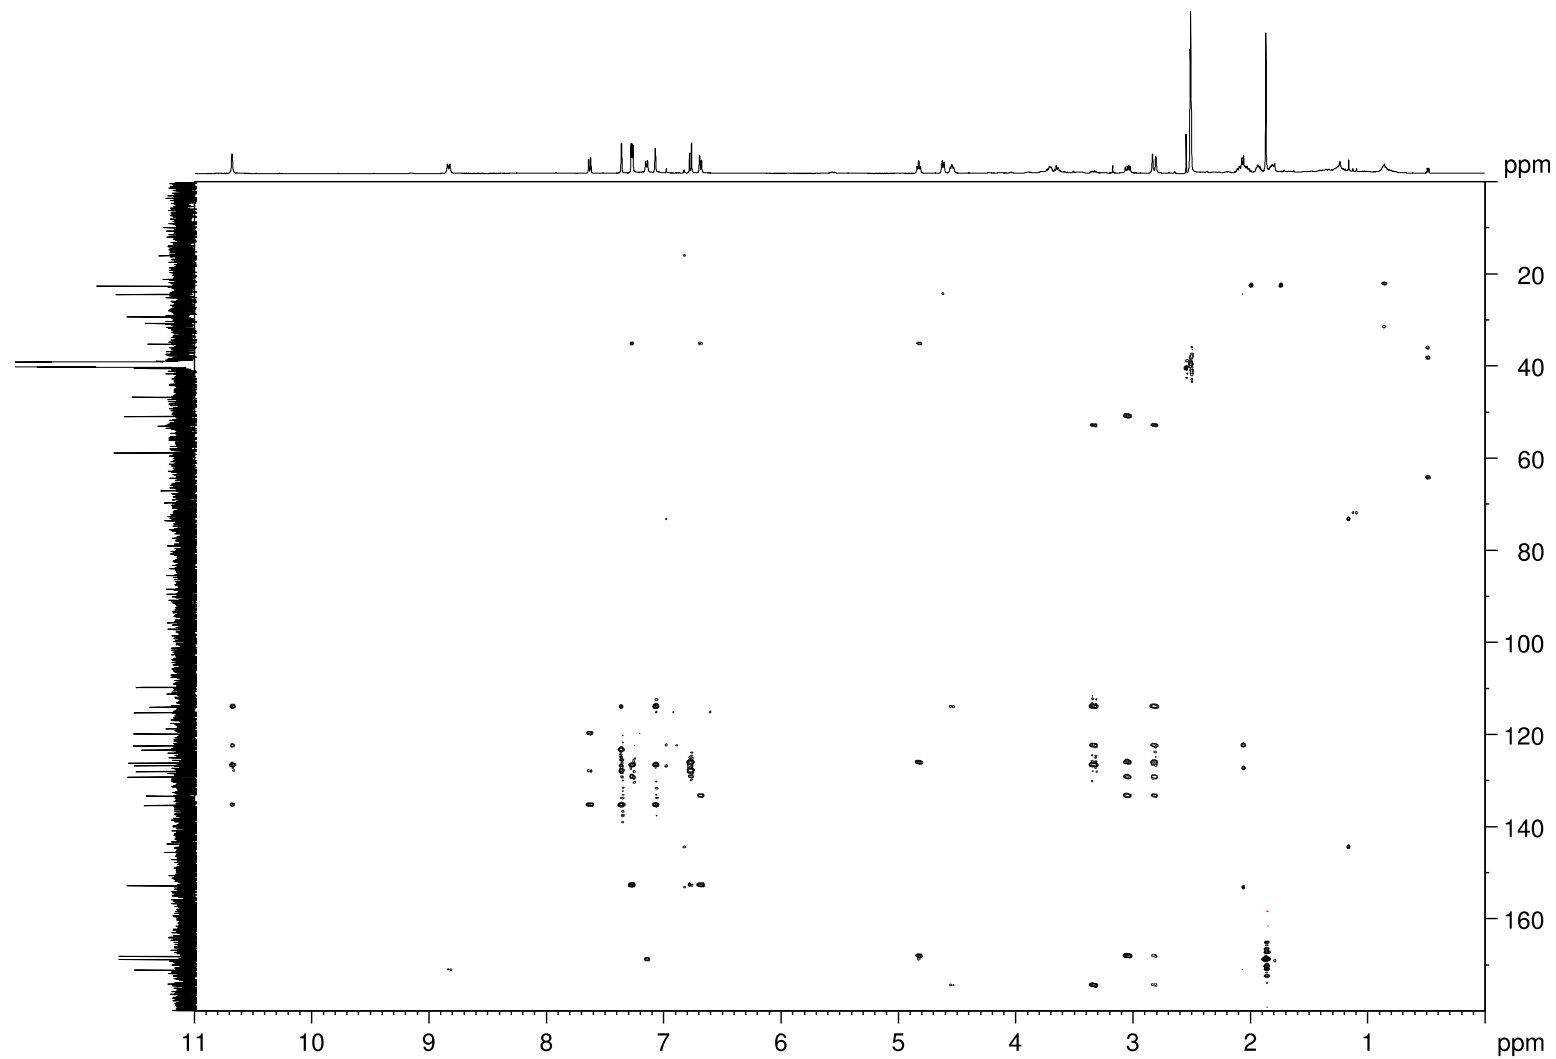



**Figure S7.** ROESY spectrum of **1** (500 MHz, DMSO- $d_6$ ).

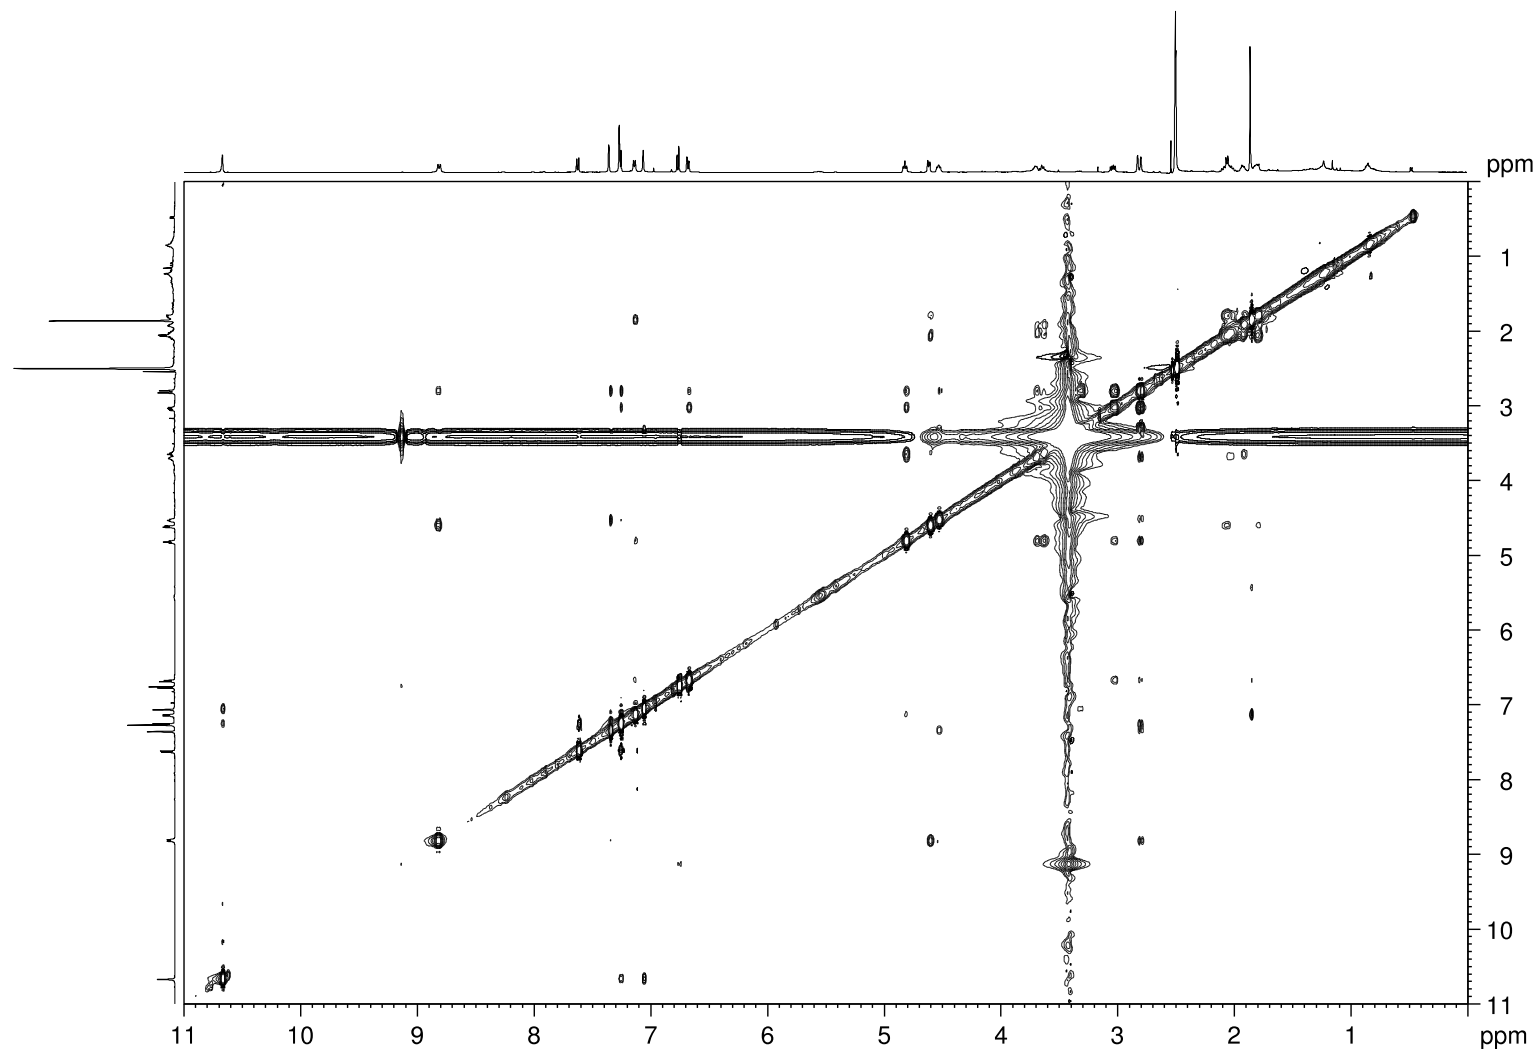



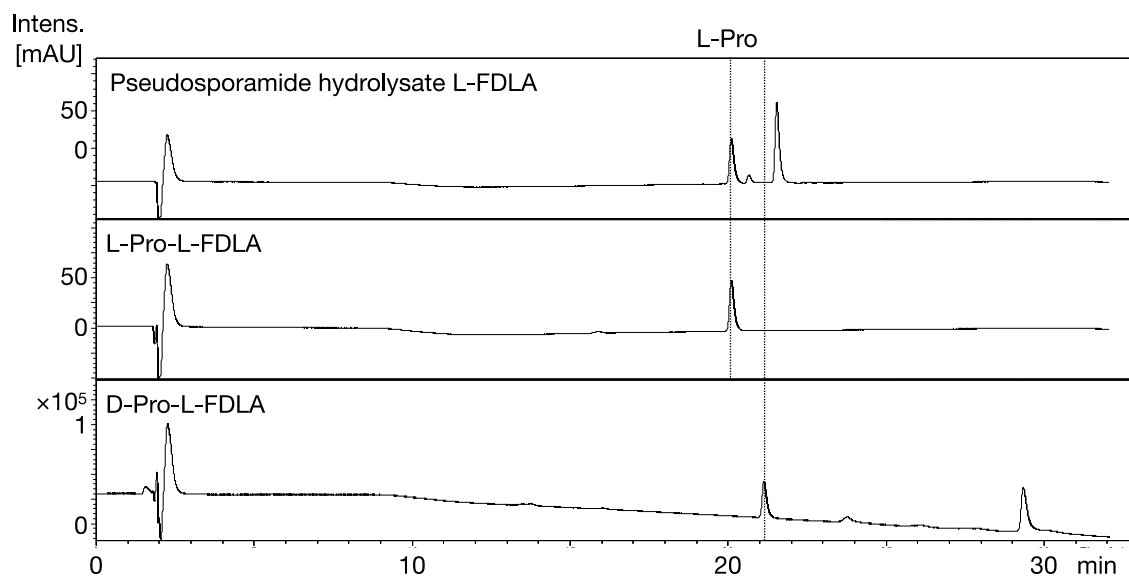

**Figure S8.** HPLC chromatogram of hydrolysate from **1** and comparison to standard amino acids, derivatized with Marfey's reagent (FDLA).

Column: Cosmosil AR-II (Nacalai Tesque, 4.6×250 mm)

Solvent: MeCN-0.1% HCO<sub>2</sub>H

Gradient MeCN (%): 0-30 min: 15-80%, 30-35 min: 80%

Flow rate: 1.0 mL/min

Absorbance: 340 nm



**Figure S9.**  $^1\text{H}$  NMR spectrum of **5a** (500 MHz,  $\text{DMSO}-d_6$ ).

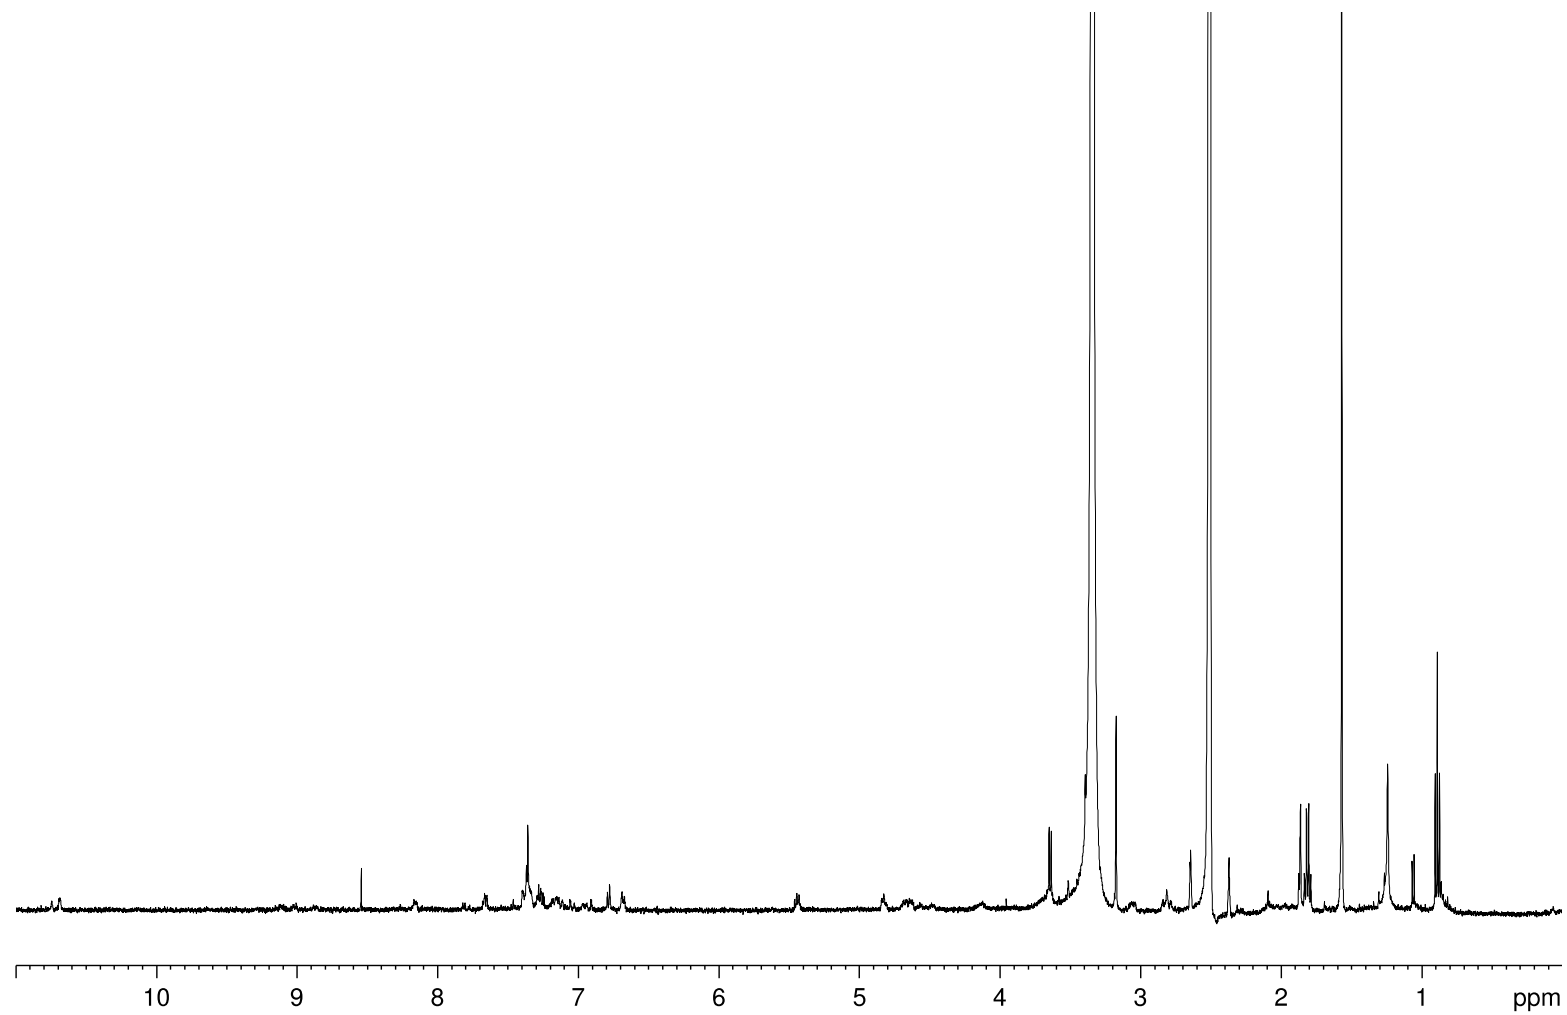



**Figure S10.**  $^1\text{H}$ - $^1\text{H}$  COSY spectrum of **5a** (500 MHz,  $\text{DMSO-}d_6$ ).

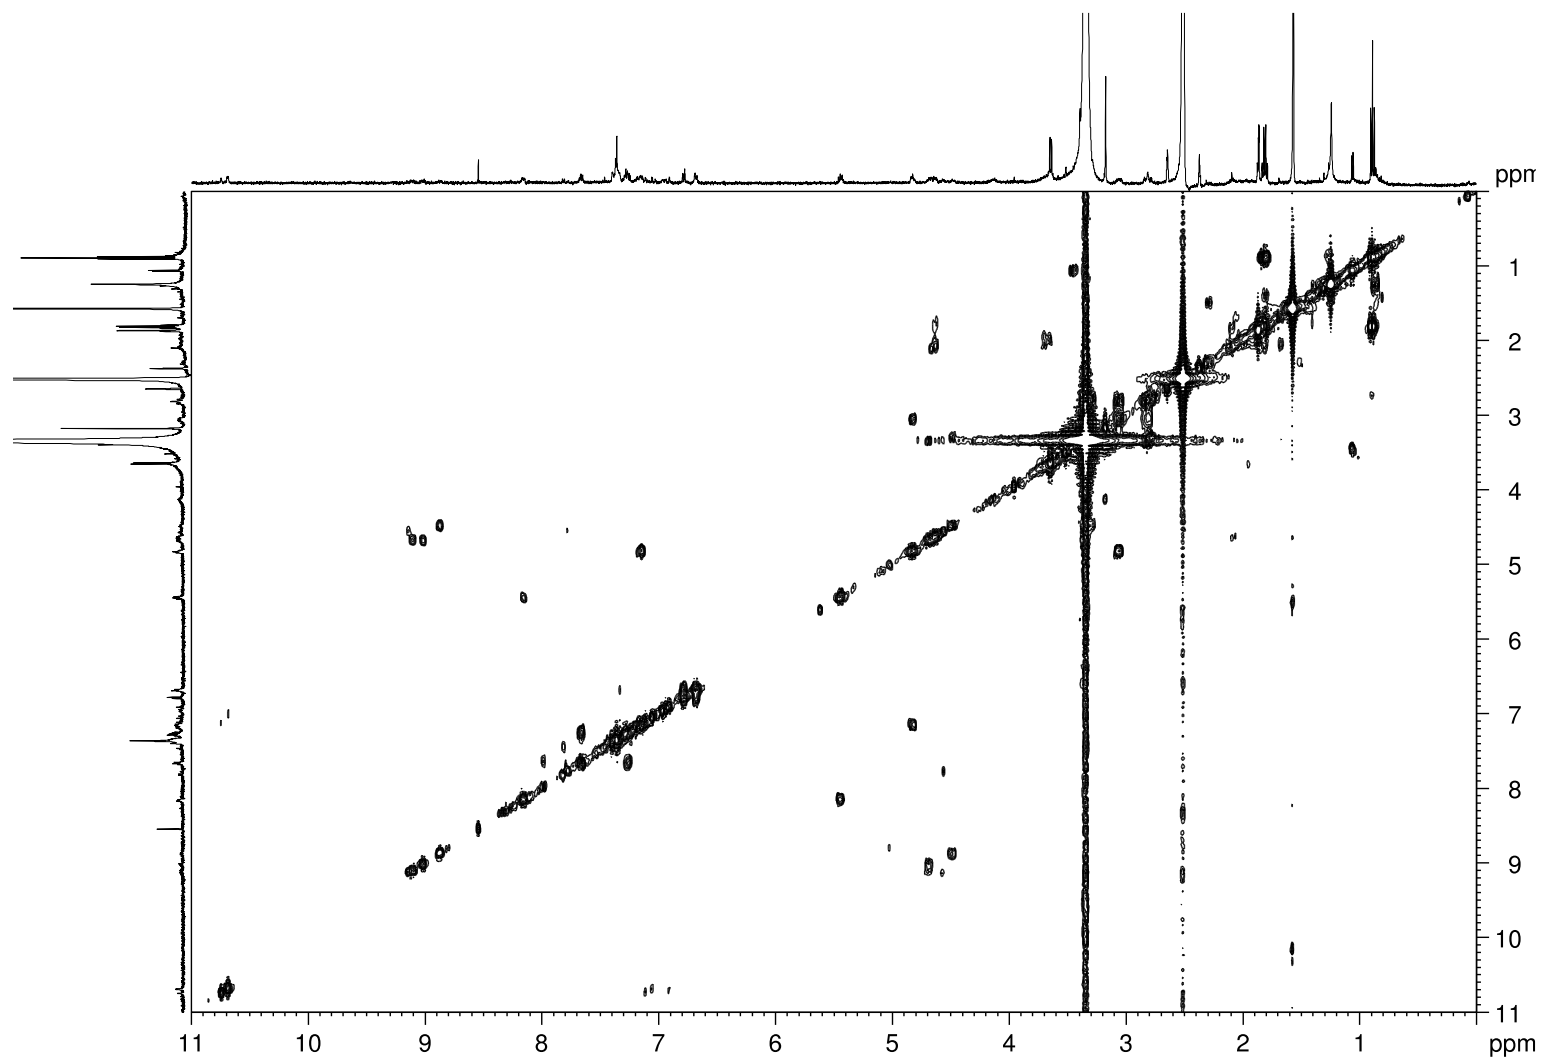



**Figure S11.**  $^1\text{H}$  NMR spectrum of **5b** (500 MHz,  $\text{DMSO}-d_6$ ).

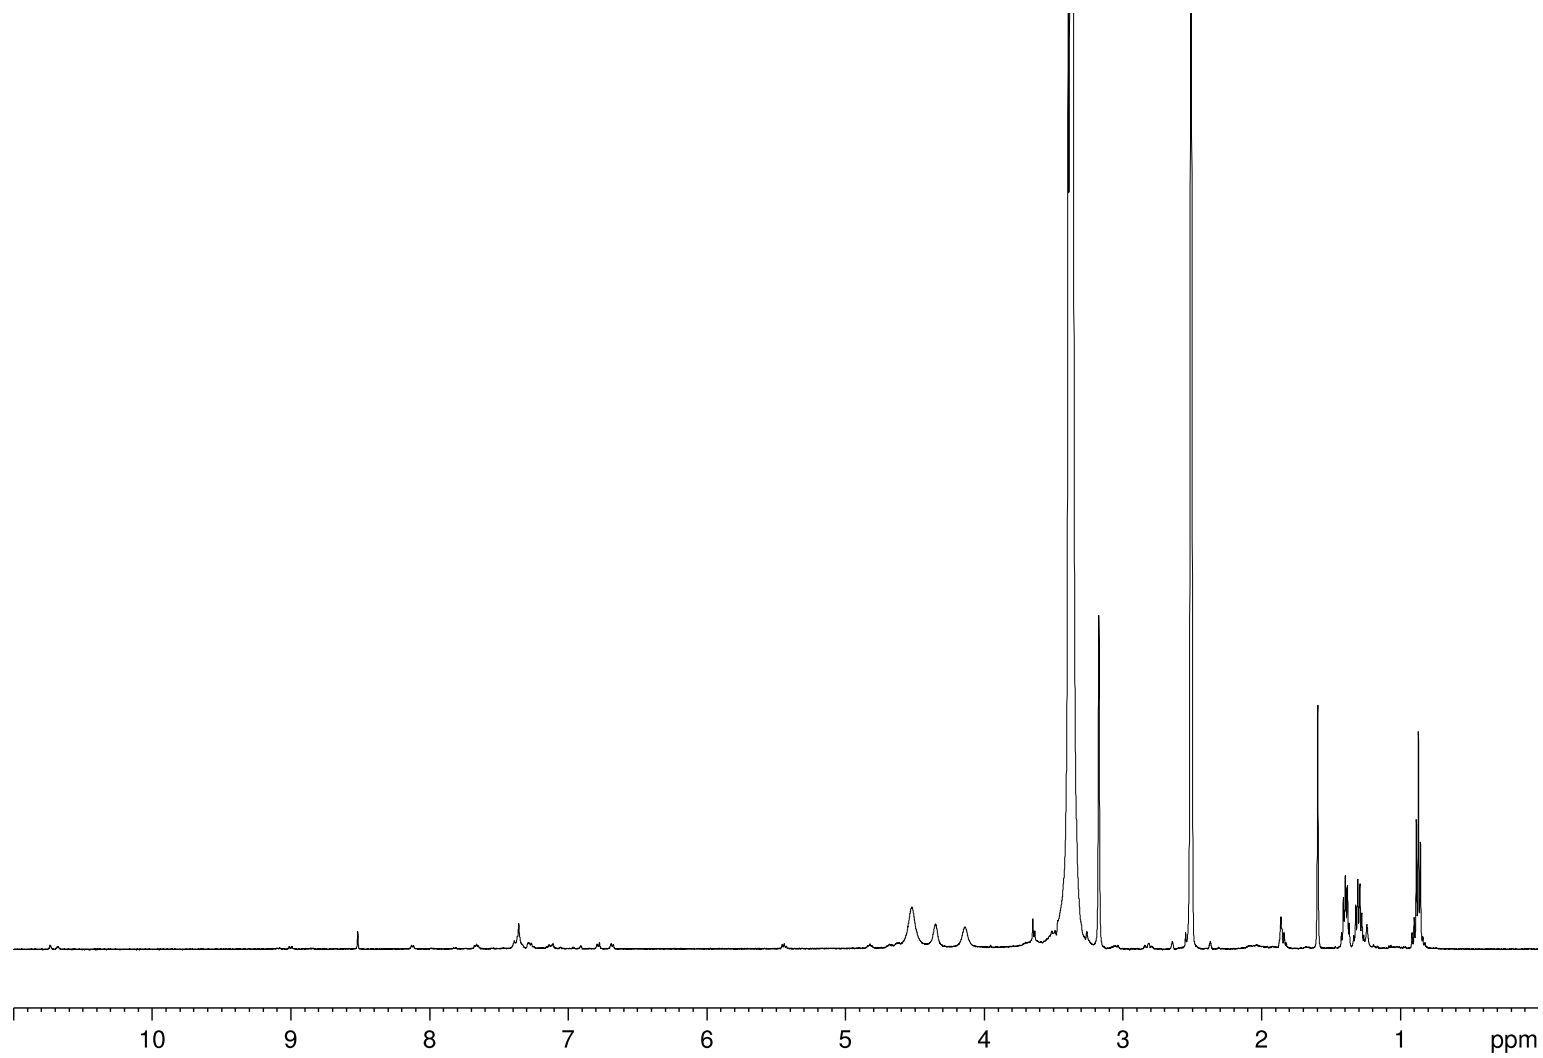



**Figure S12.**  $^1\text{H}$ - $^1\text{H}$  COSY spectrum of **5b** (500 MHz,  $\text{DMSO-}d_6$ ).

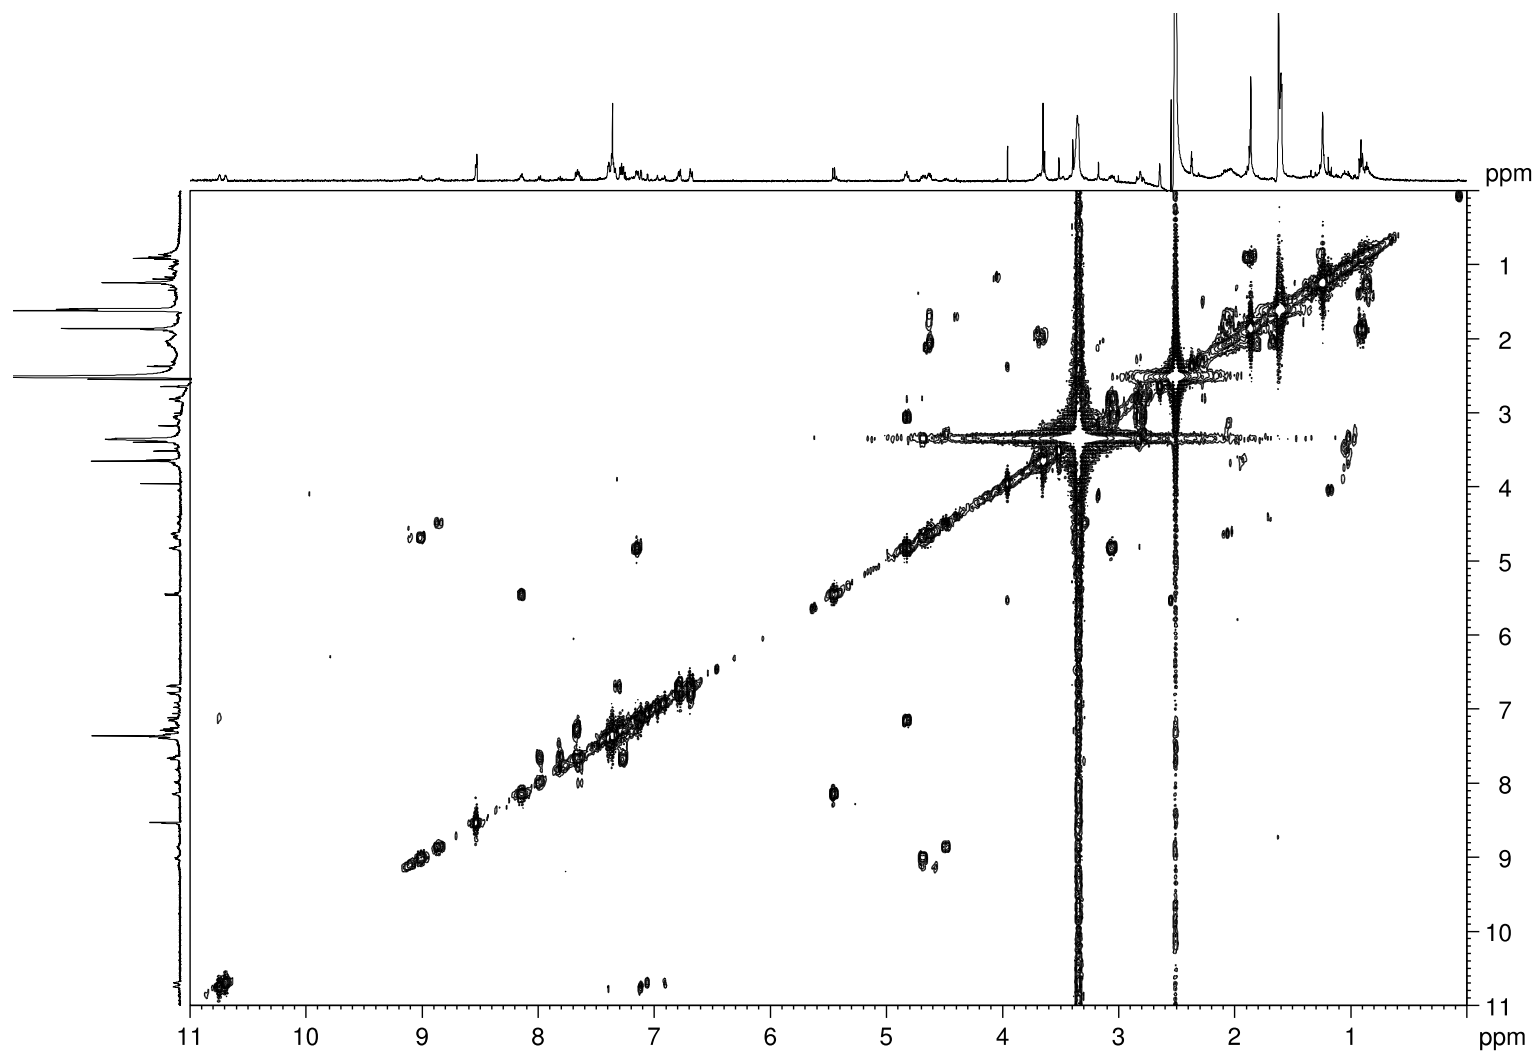



**Figure S13.**  $^1\text{H}$  NMR spectrum of pseudosporamicin A (**2**) (500 MHz,  $\text{CDCl}_3$ ).

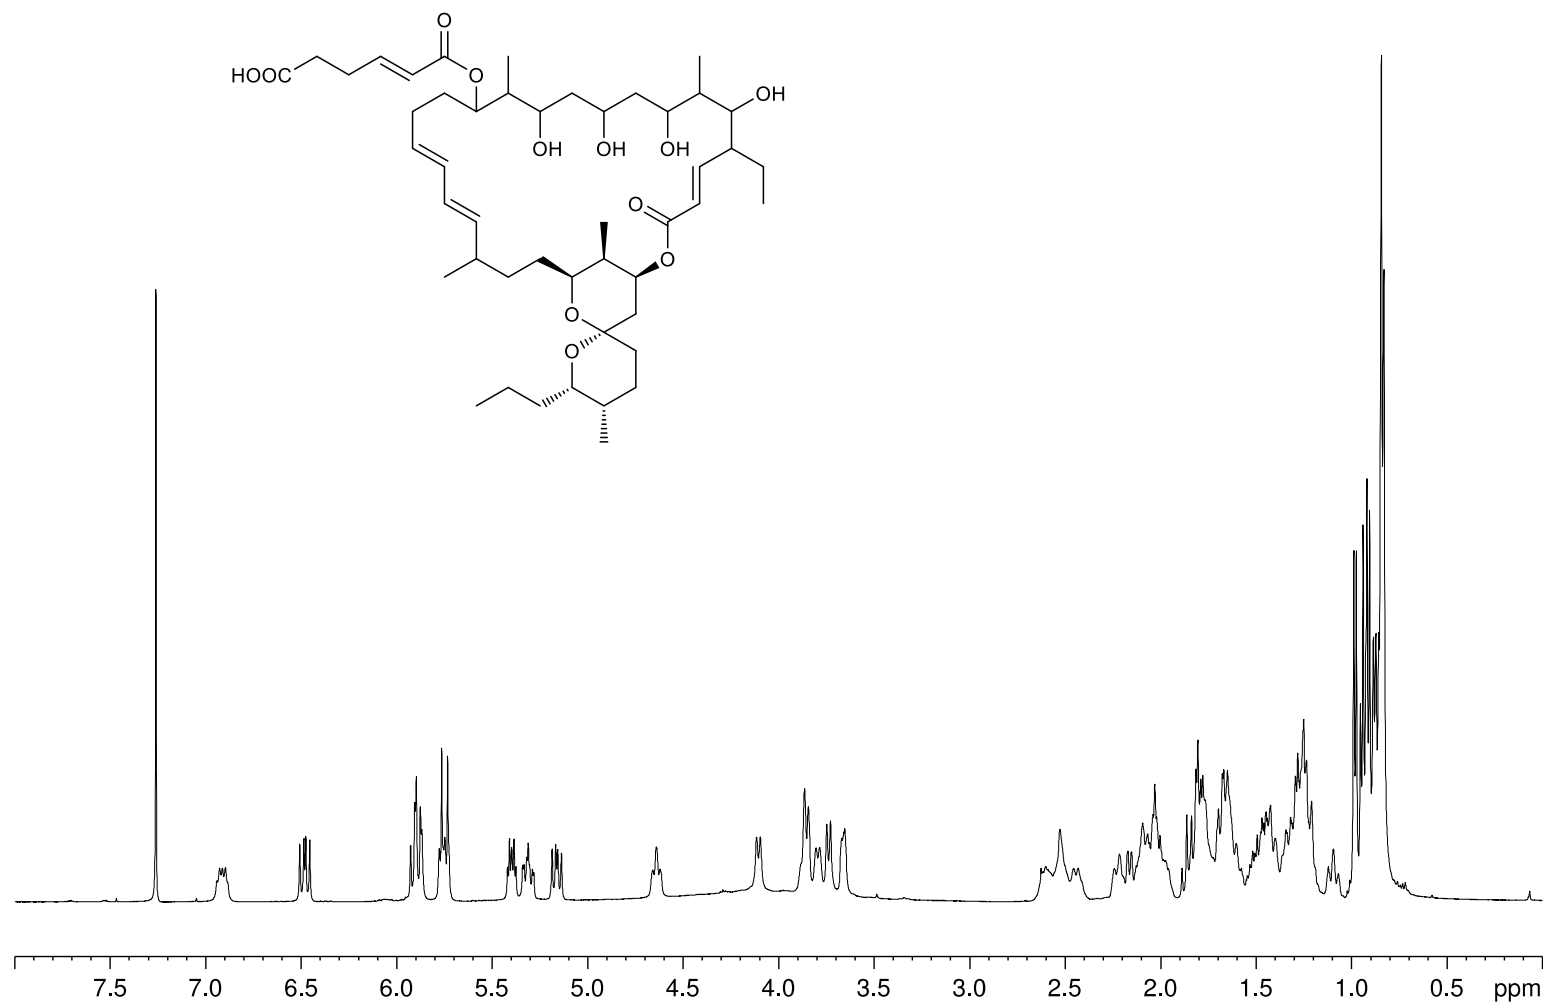



**Figure S14.**  $^{13}\text{C}$  NMR spectrum of **2** (125 MHz,  $\text{CDCl}_3$ ).

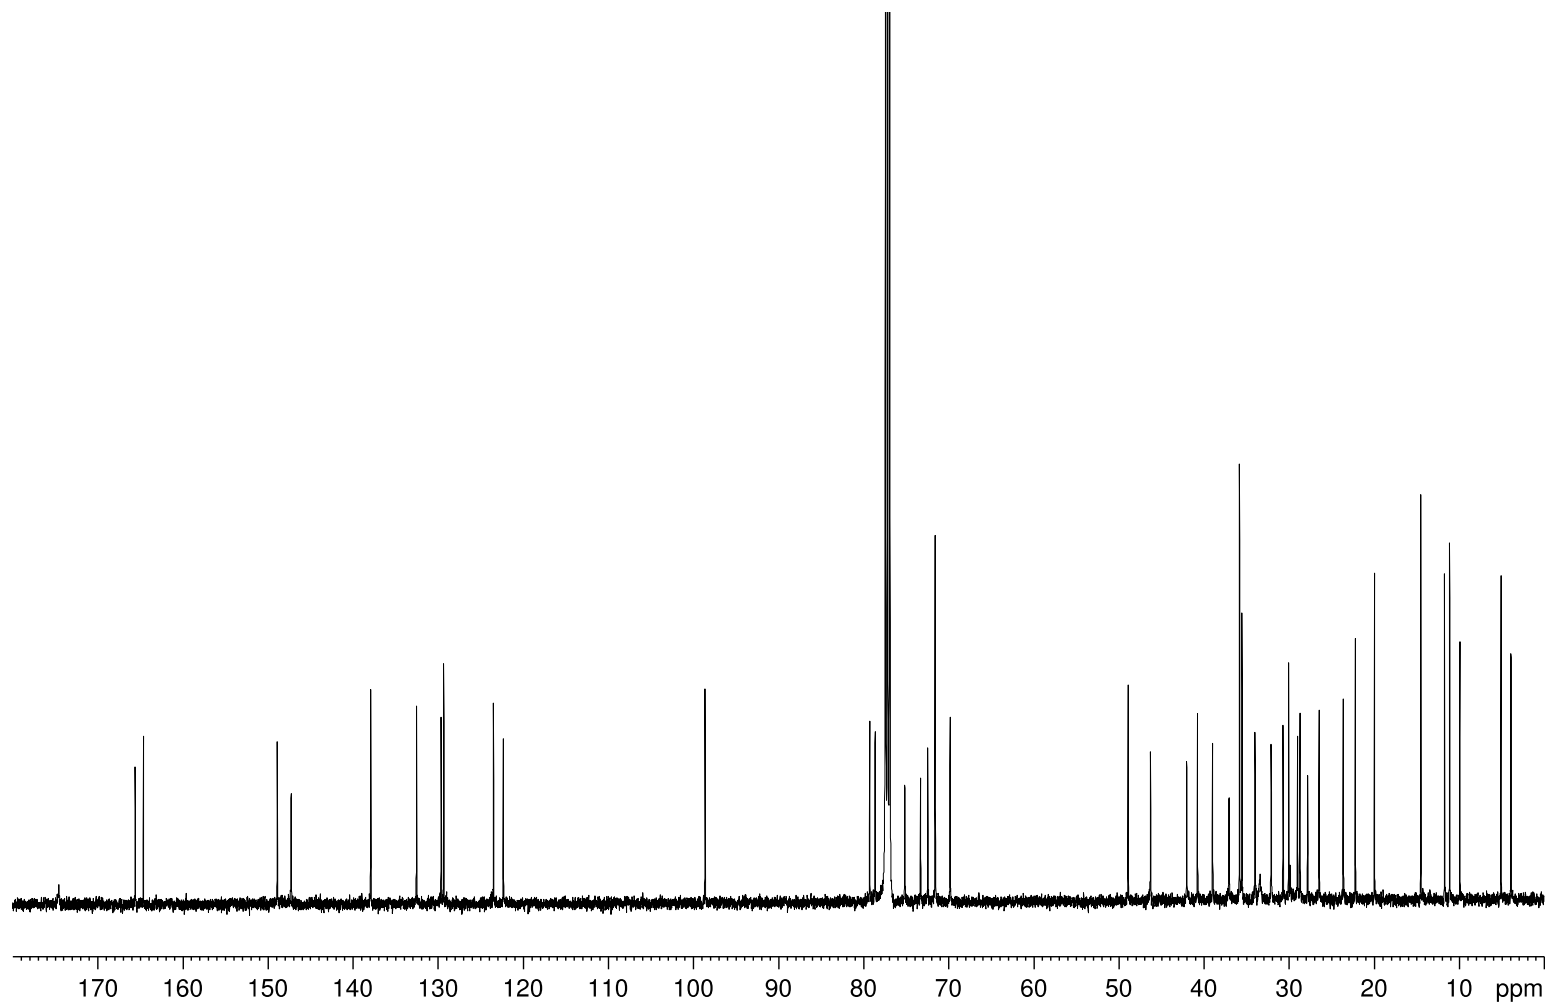



**Figure S15.**  $^1\text{H}$ - $^1\text{H}$  COSY spectrum of **2** (500 MHz,  $\text{CDCl}_3$ ).

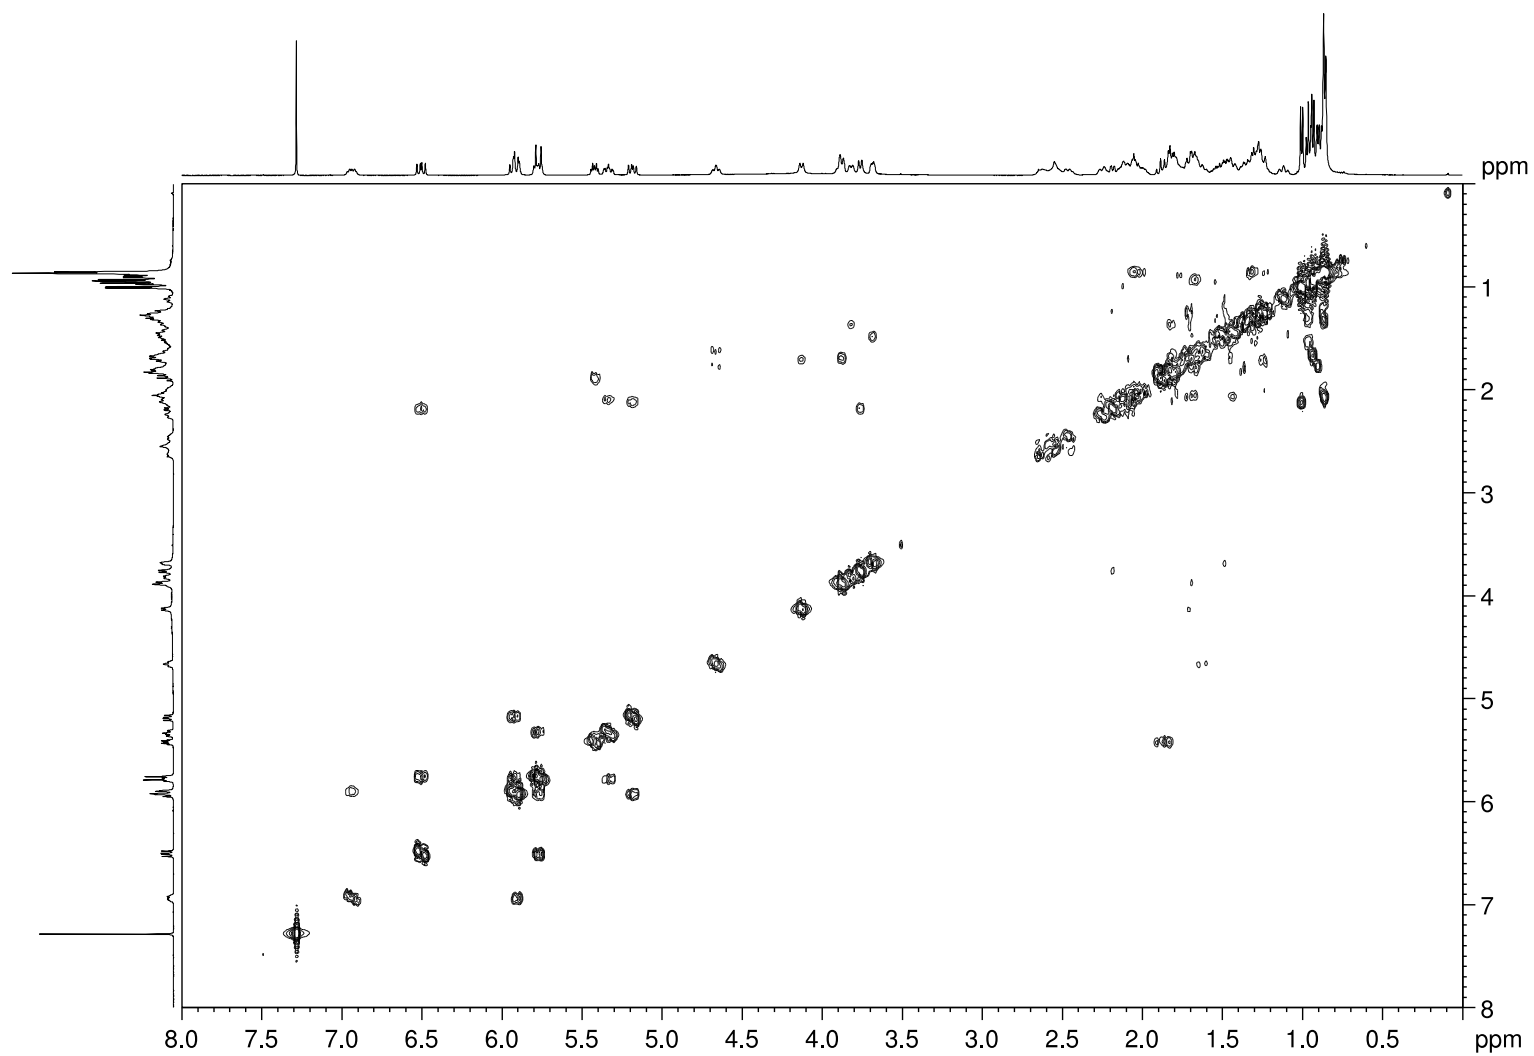



**Figure S16.** HSQC spectrum of **2** (500 MHz, CDCl<sub>3</sub>).

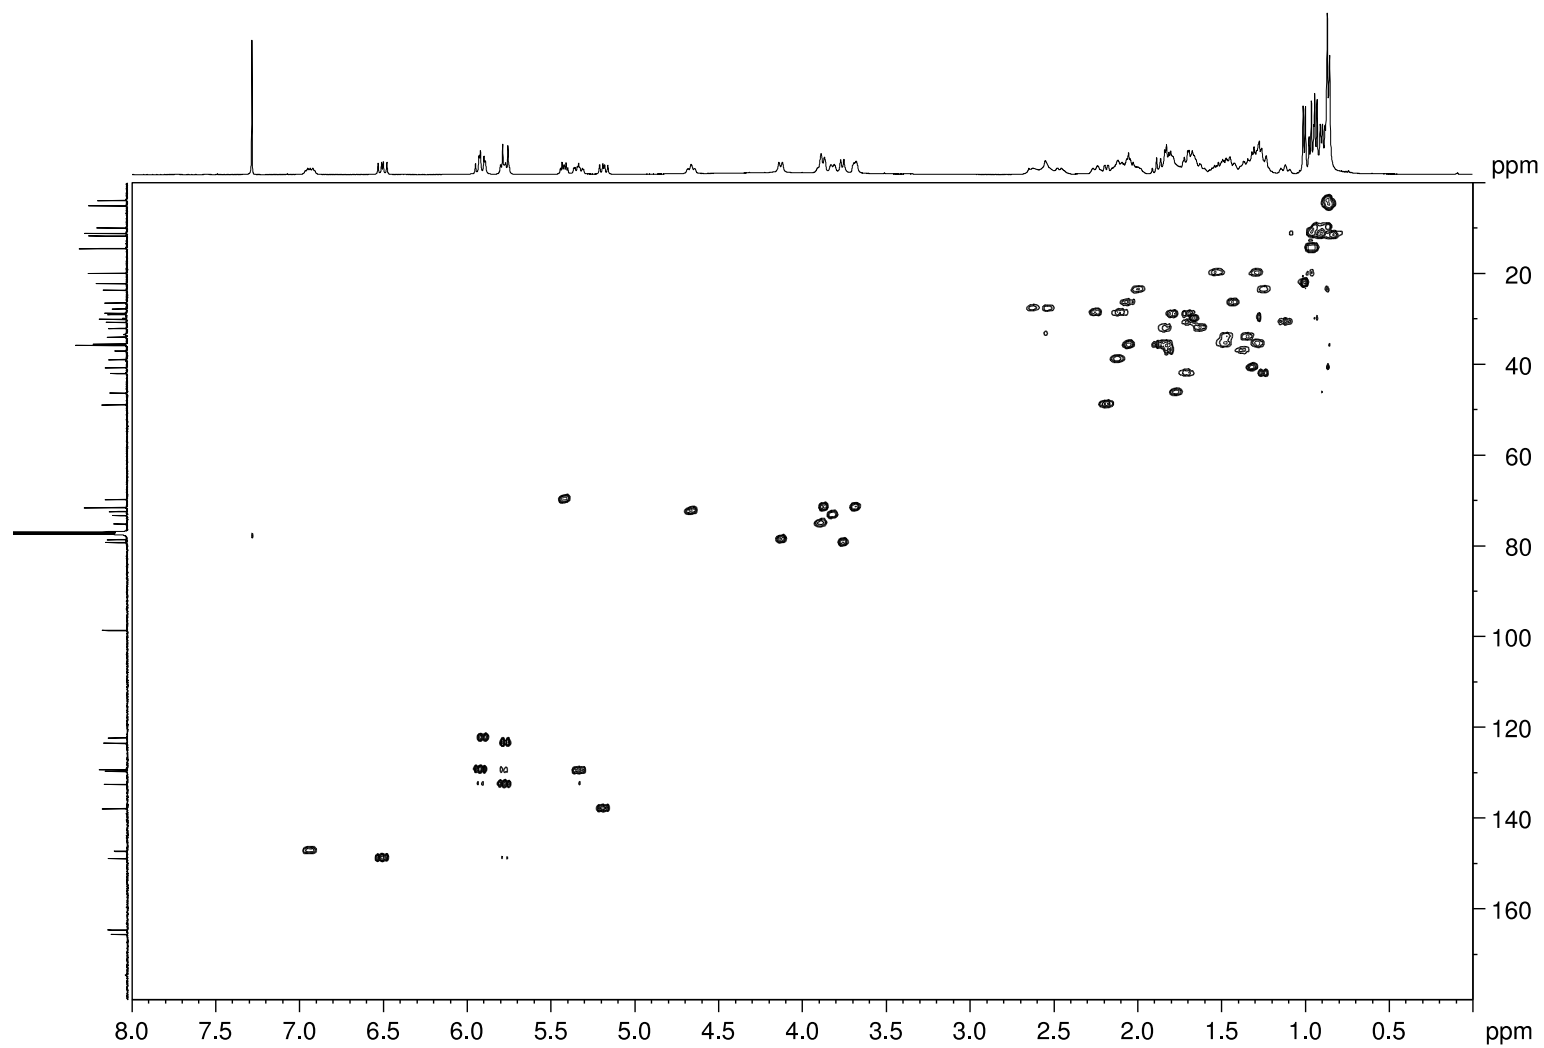



**Figure S17.** HMBC spectrum of **2** (500 MHz,  $\text{CDCl}_3$ ).

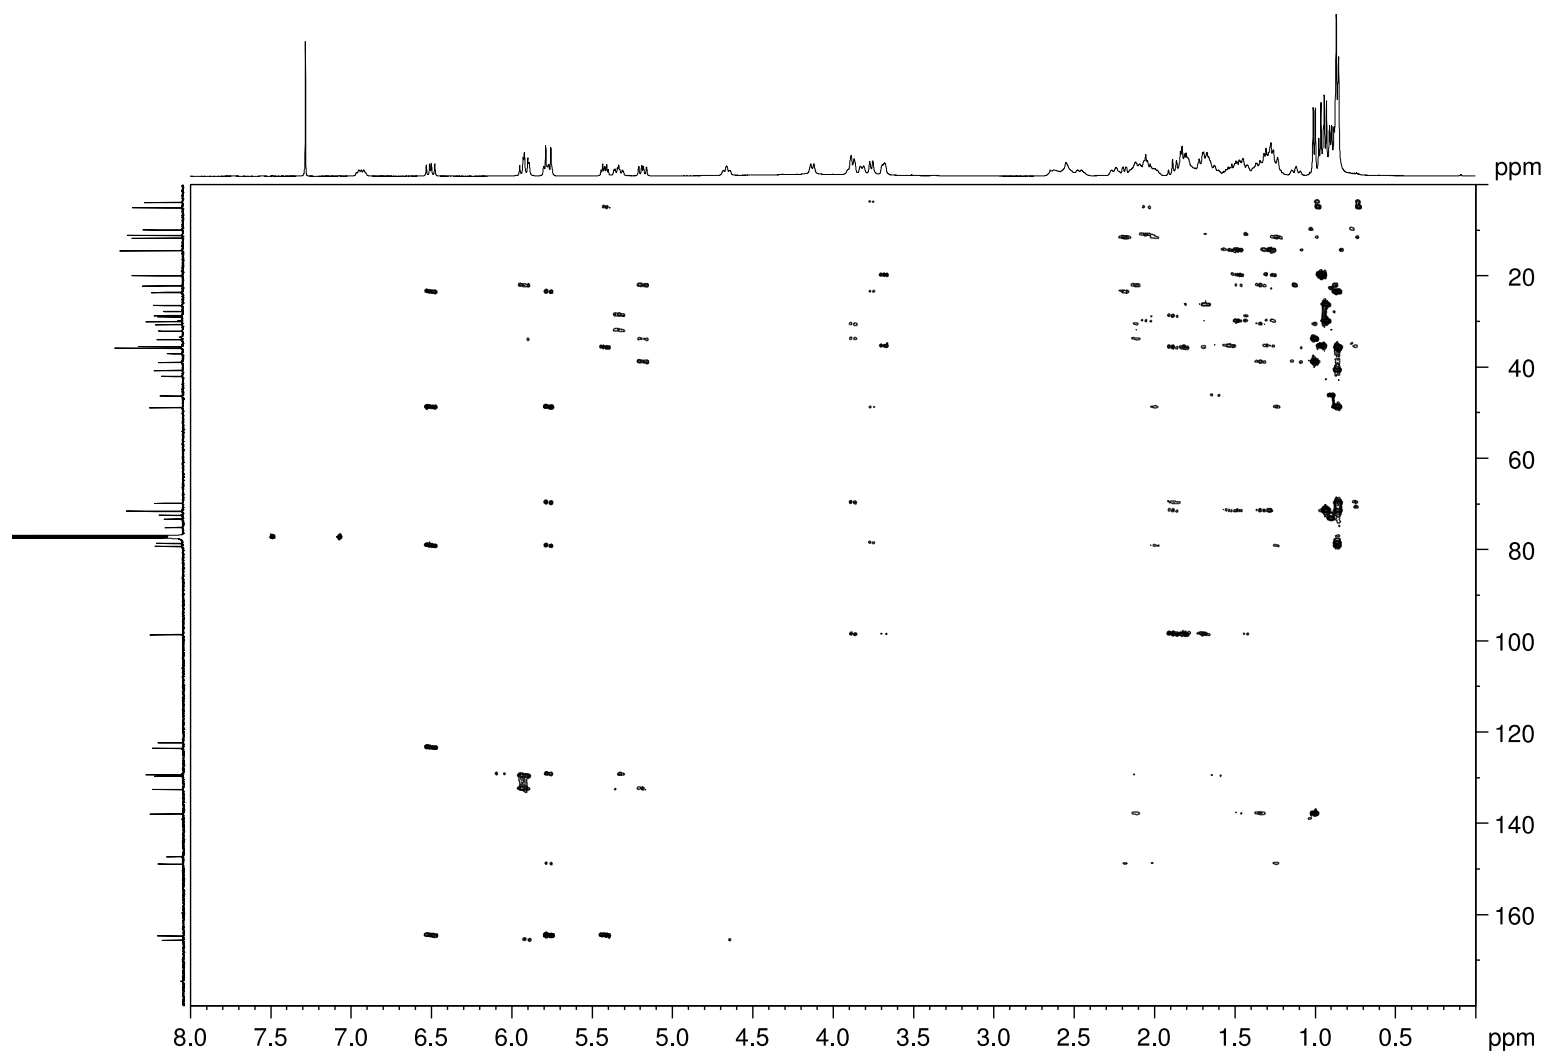



**Figure S18.** NOESY spectrum of **2** (500 MHz,  $\text{CDCl}_3$ ).

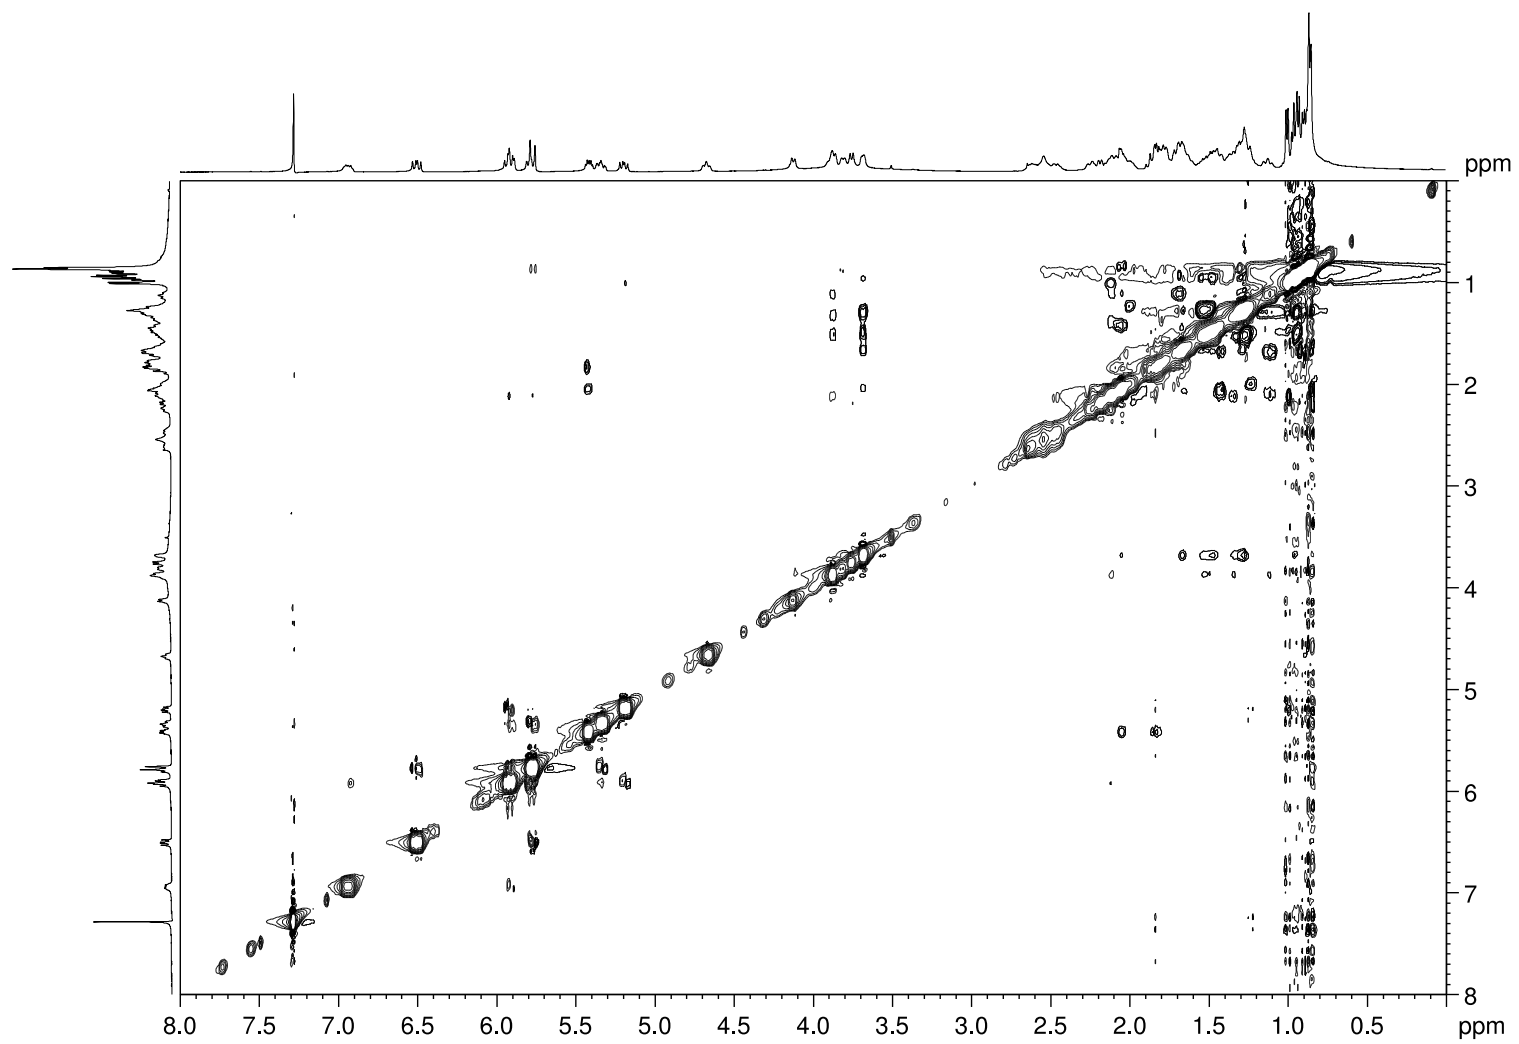







**Figure S20.**  $^{13}\text{C}$  NMR spectrum of **3** (125 MHz,  $\text{CDCl}_3$ ).

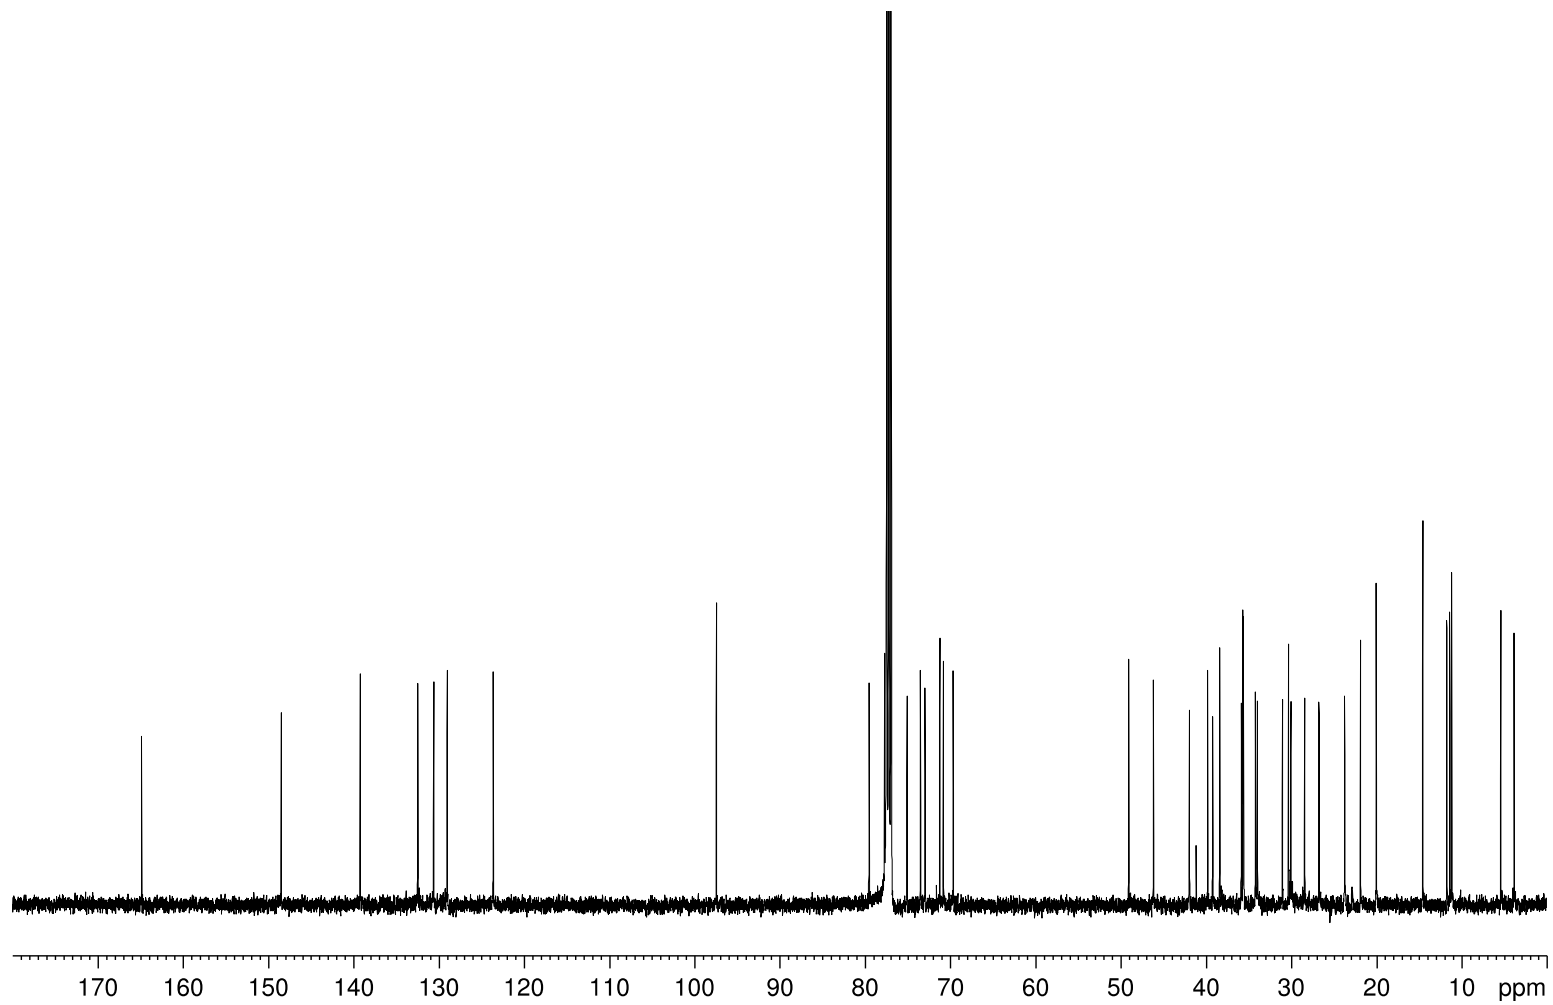



**Figure S21.**  $^1\text{H}$ - $^1\text{H}$  COSY spectrum of **3** (500 MHz,  $\text{CDCl}_3$ ).

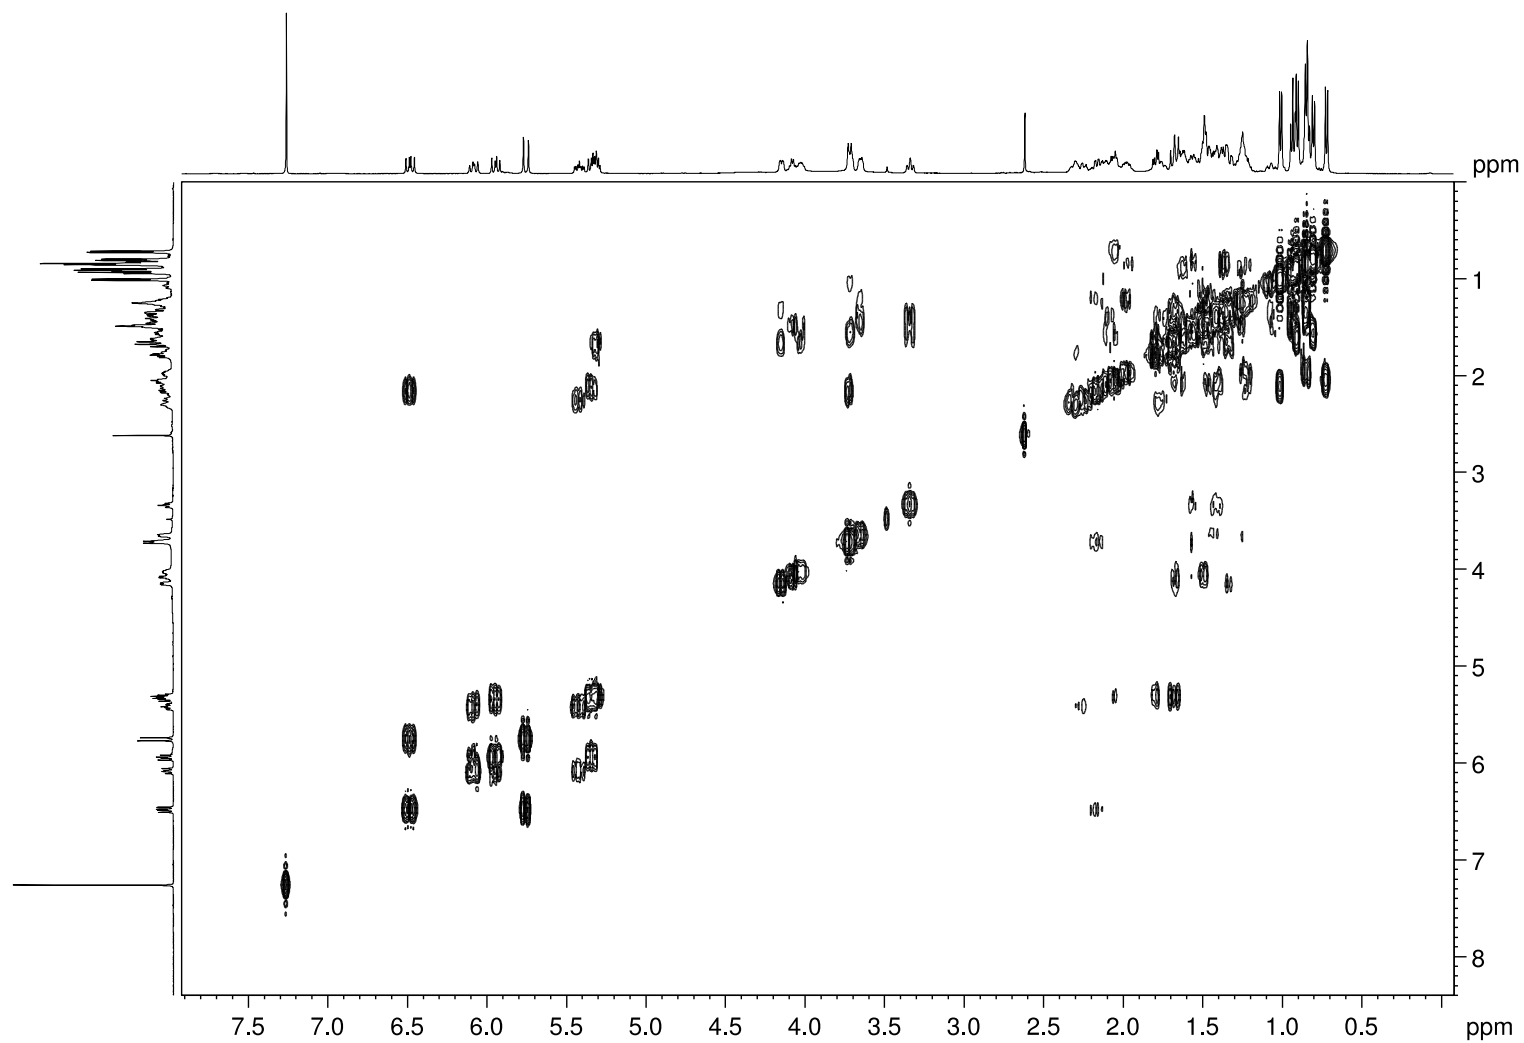



**Figure S22.** HSQC spectrum of **3** (500 MHz, CDCl<sub>3</sub>).

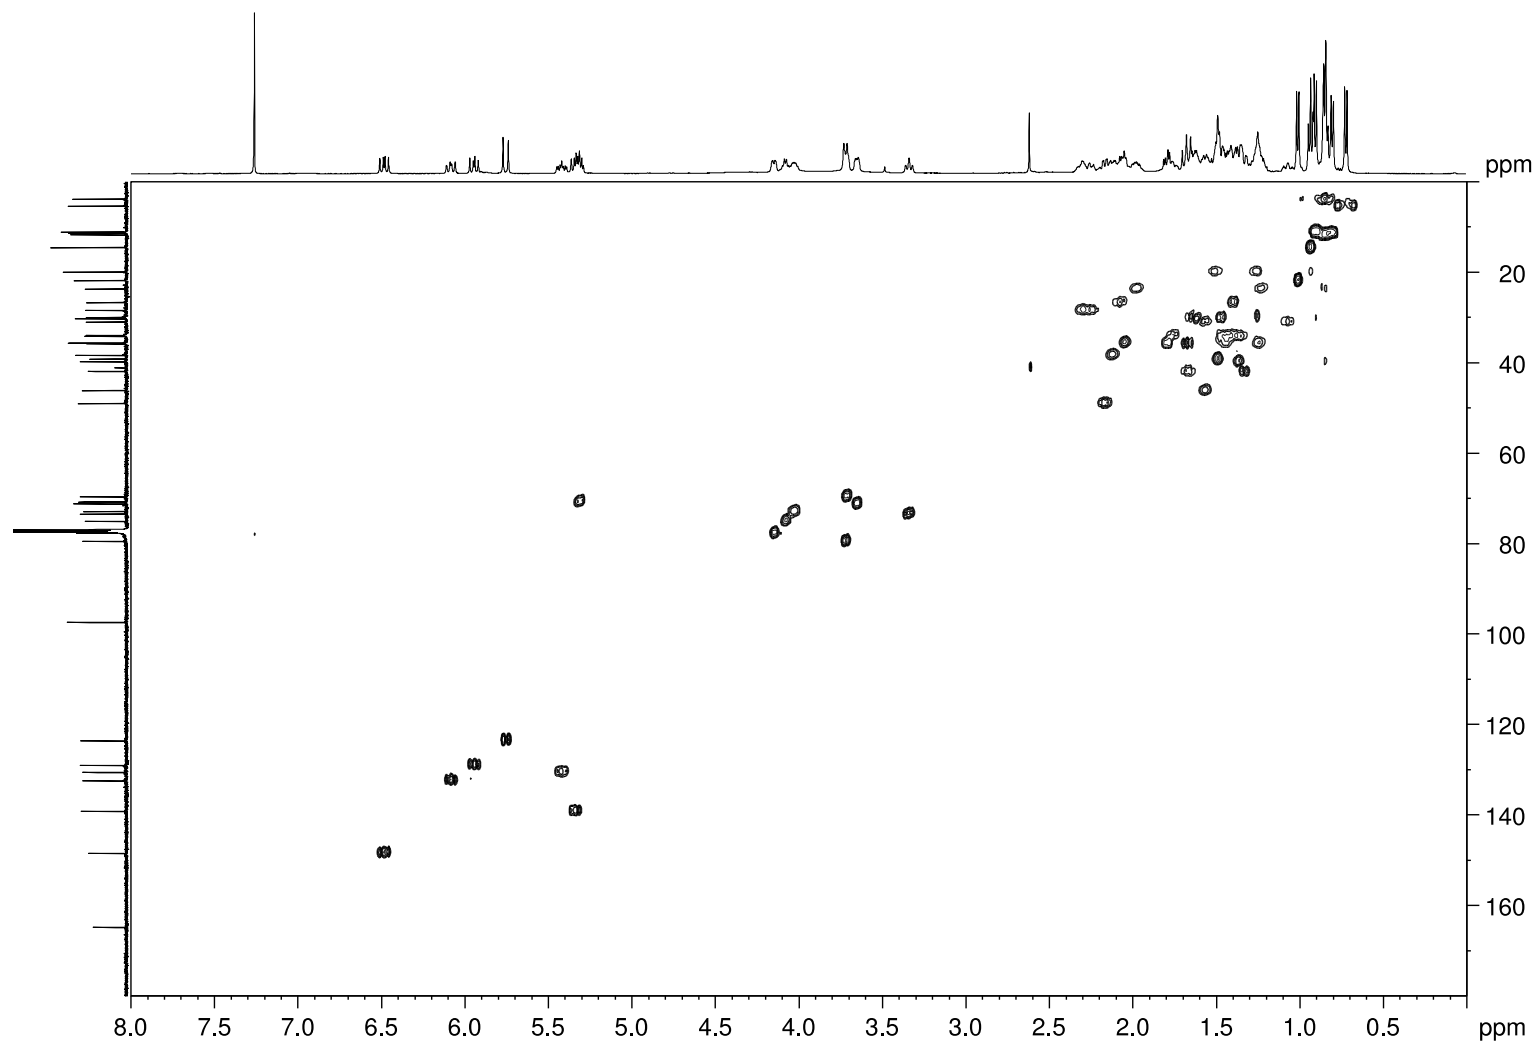



**Figure S23.** HMBC spectrum of **3** (500 MHz, CDCl<sub>3</sub>).

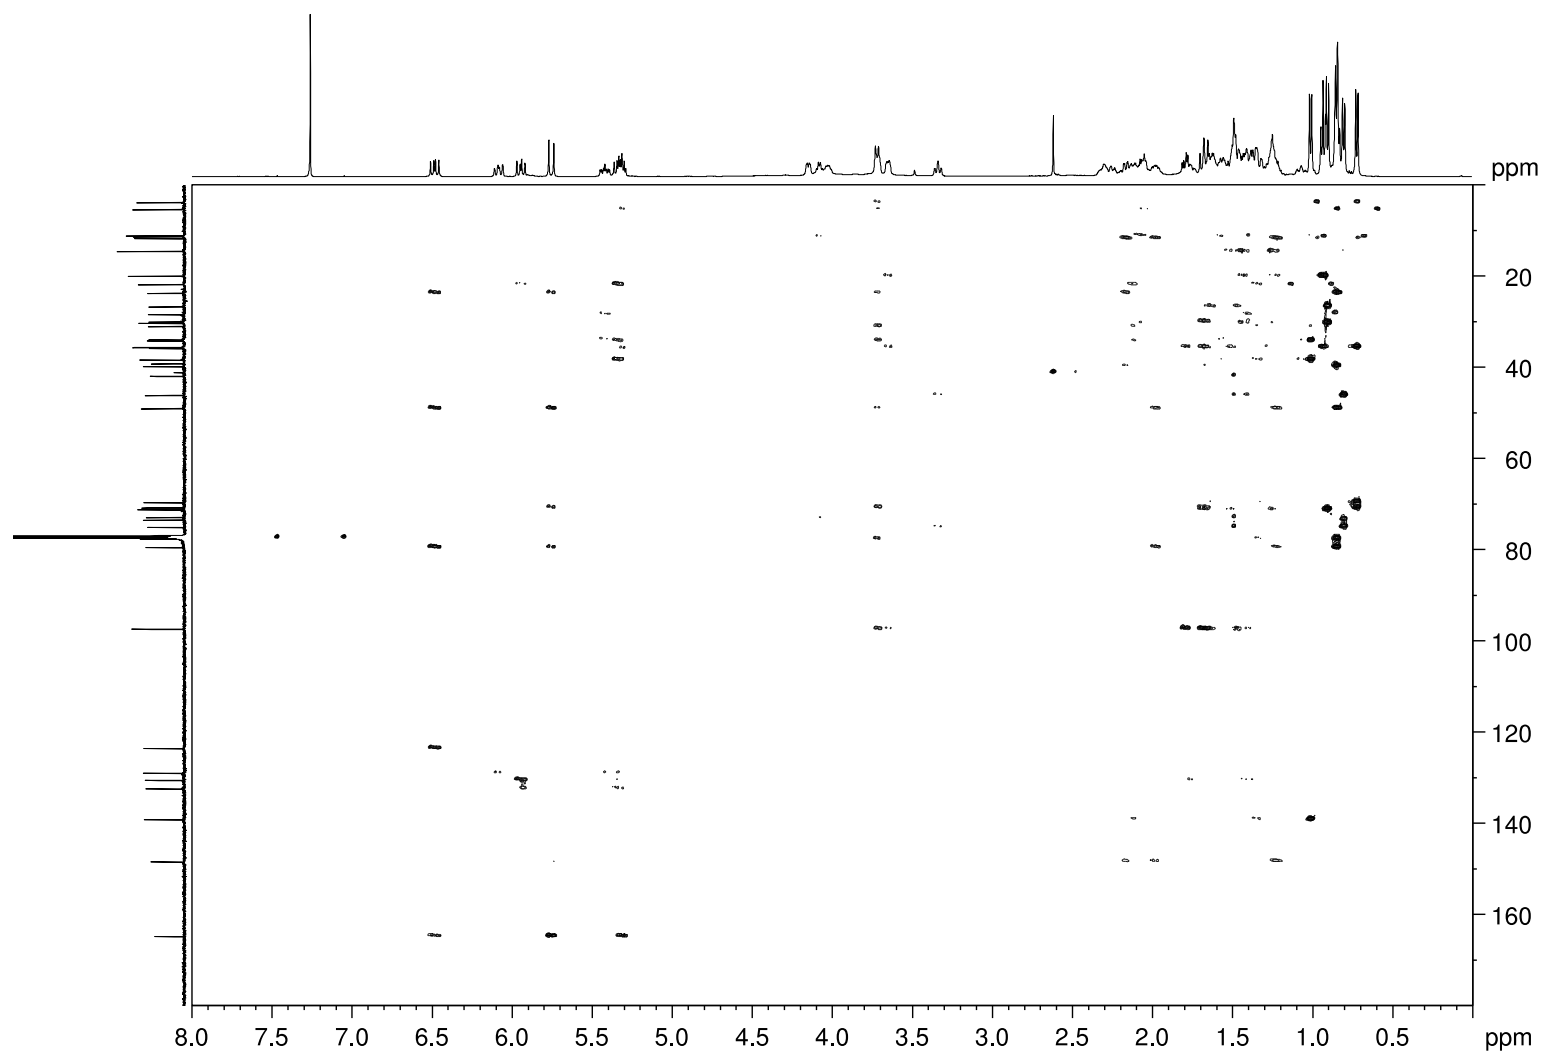



**Figure S24.** NOESY spectrum of **3** (500 MHz, CDCl<sub>3</sub>).

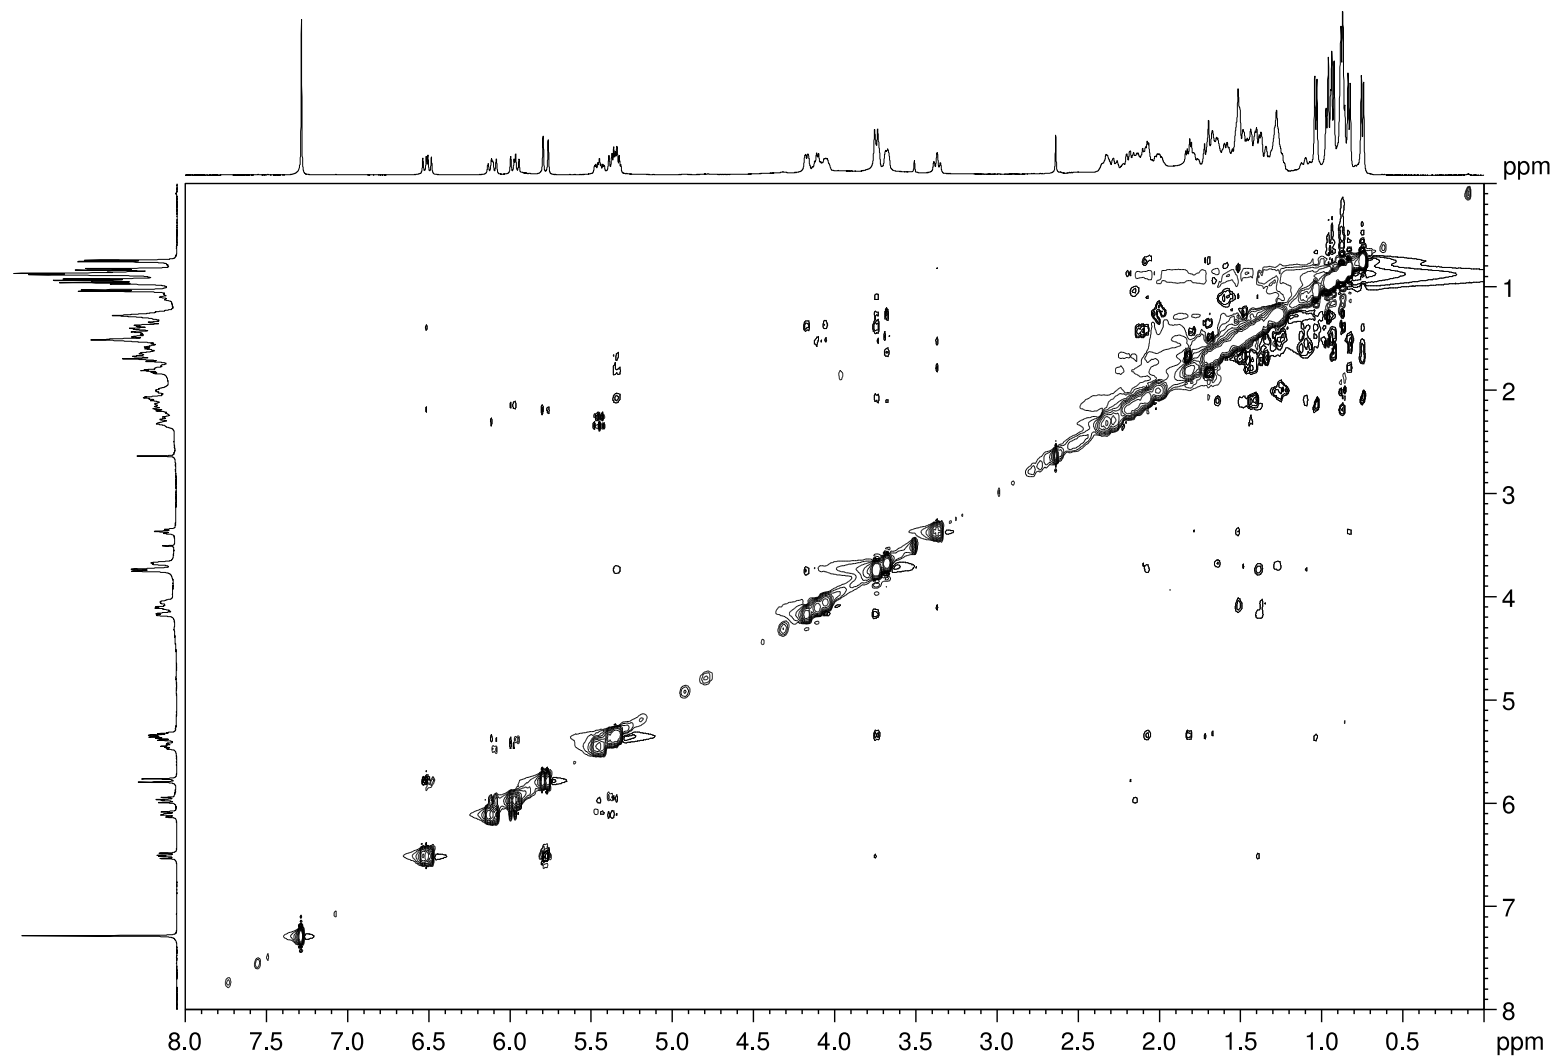



**Figure S25.**  $^1\text{H}$  NMR spectrum of pseudosporamicin C (**4**) (500 MHz,  $\text{CDCl}_3$ ).

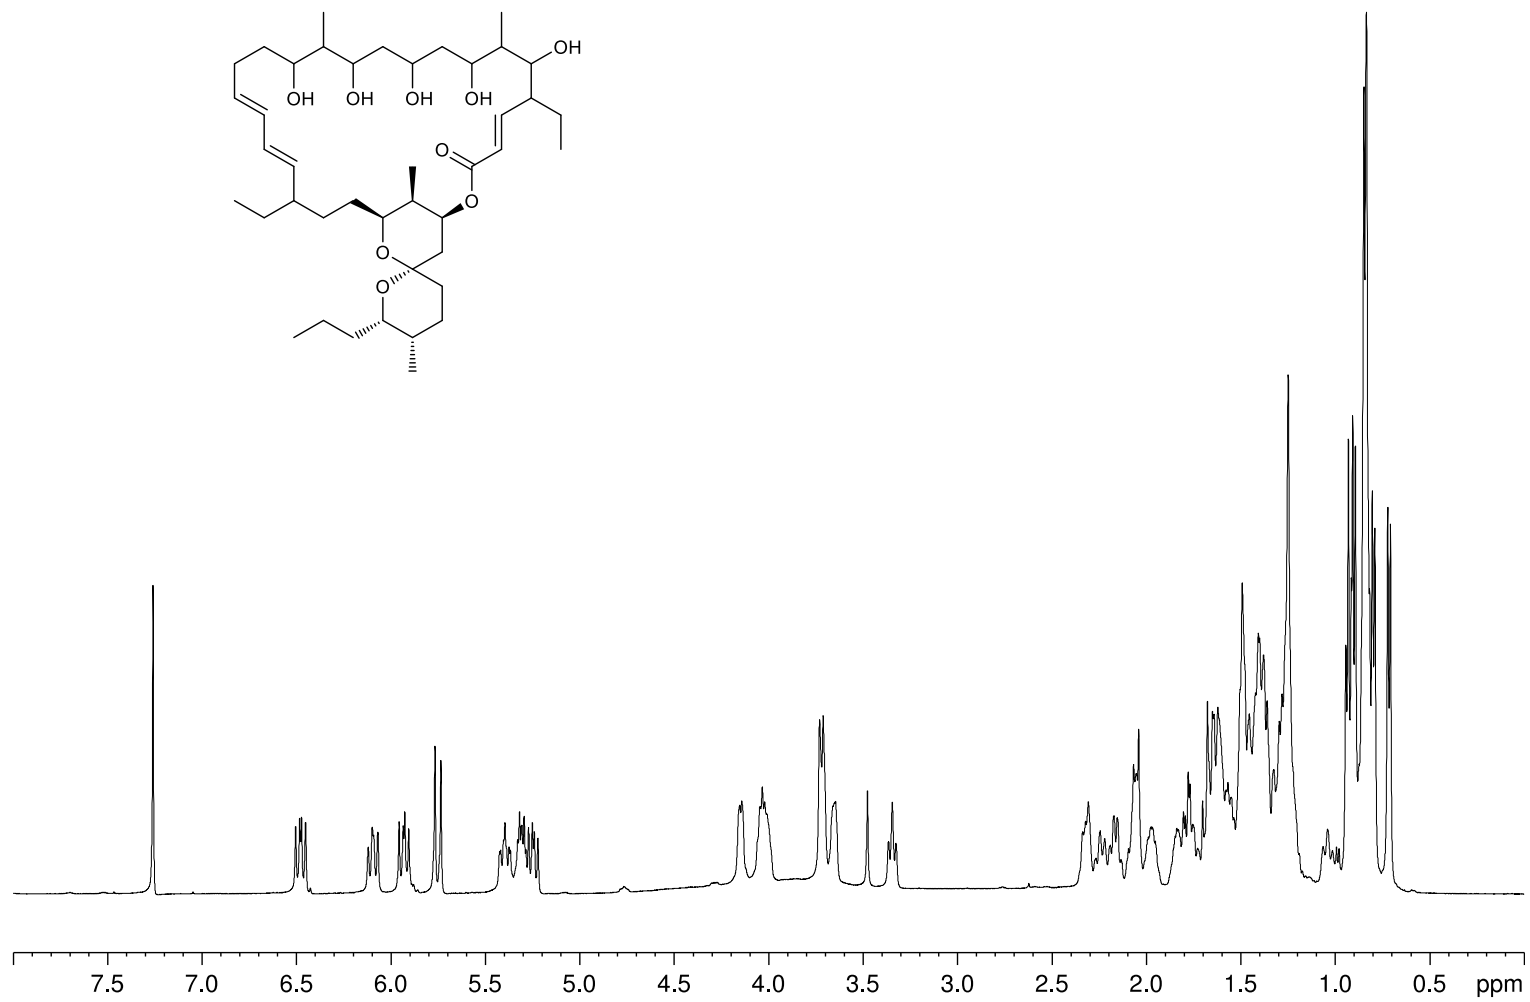



**Figure S26.**  $^{13}\text{C}$  NMR spectrum of **4** (125 MHz,  $\text{CDCl}_3$ ).

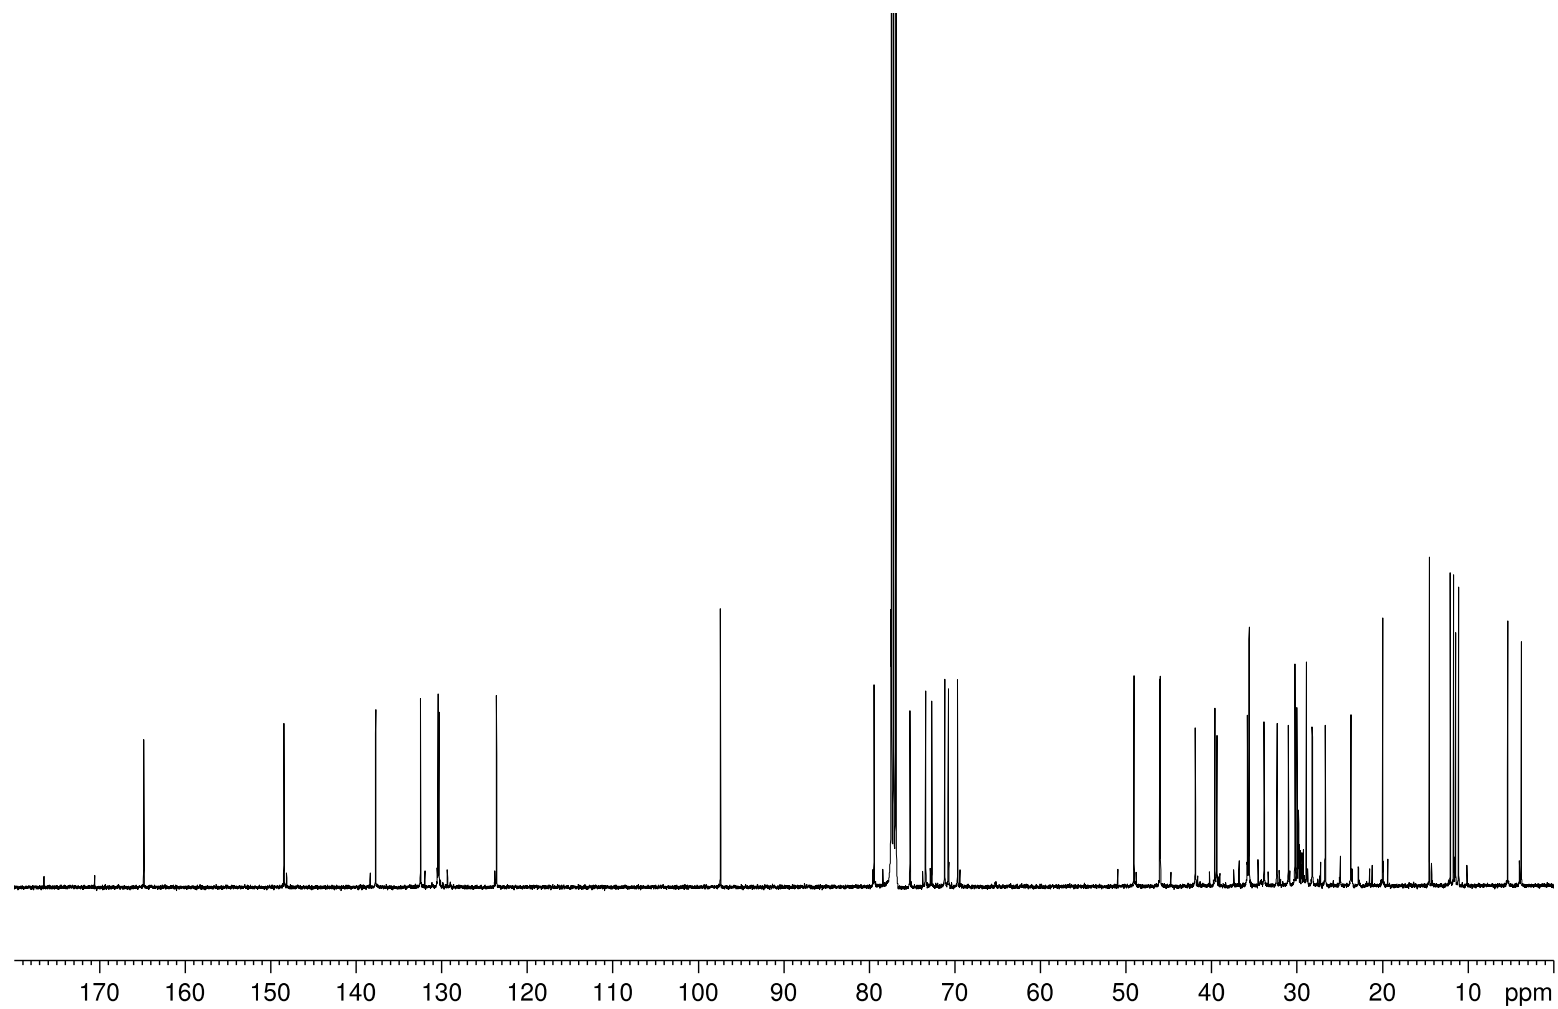



**Figure S27.**  $^1\text{H}$ - $^1\text{H}$  COSY spectrum of **4** (500 MHz,  $\text{CDCl}_3$ ).

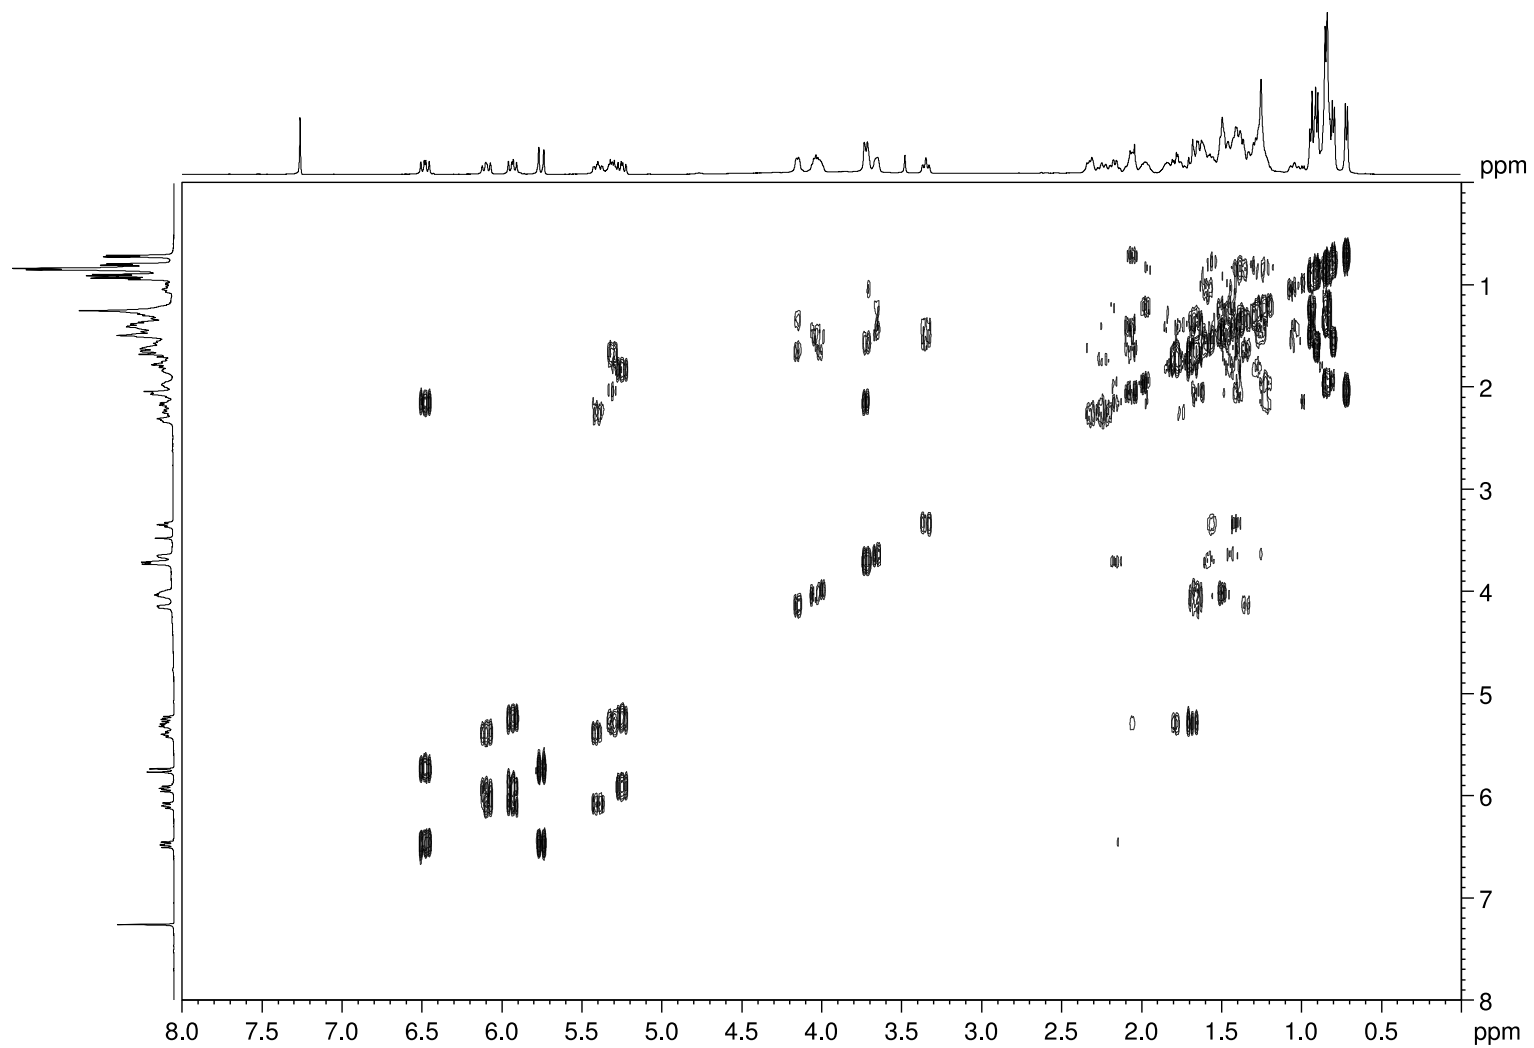



**Figure S28.** HSQC spectrum of **4** (500 MHz, CDCl<sub>3</sub>).

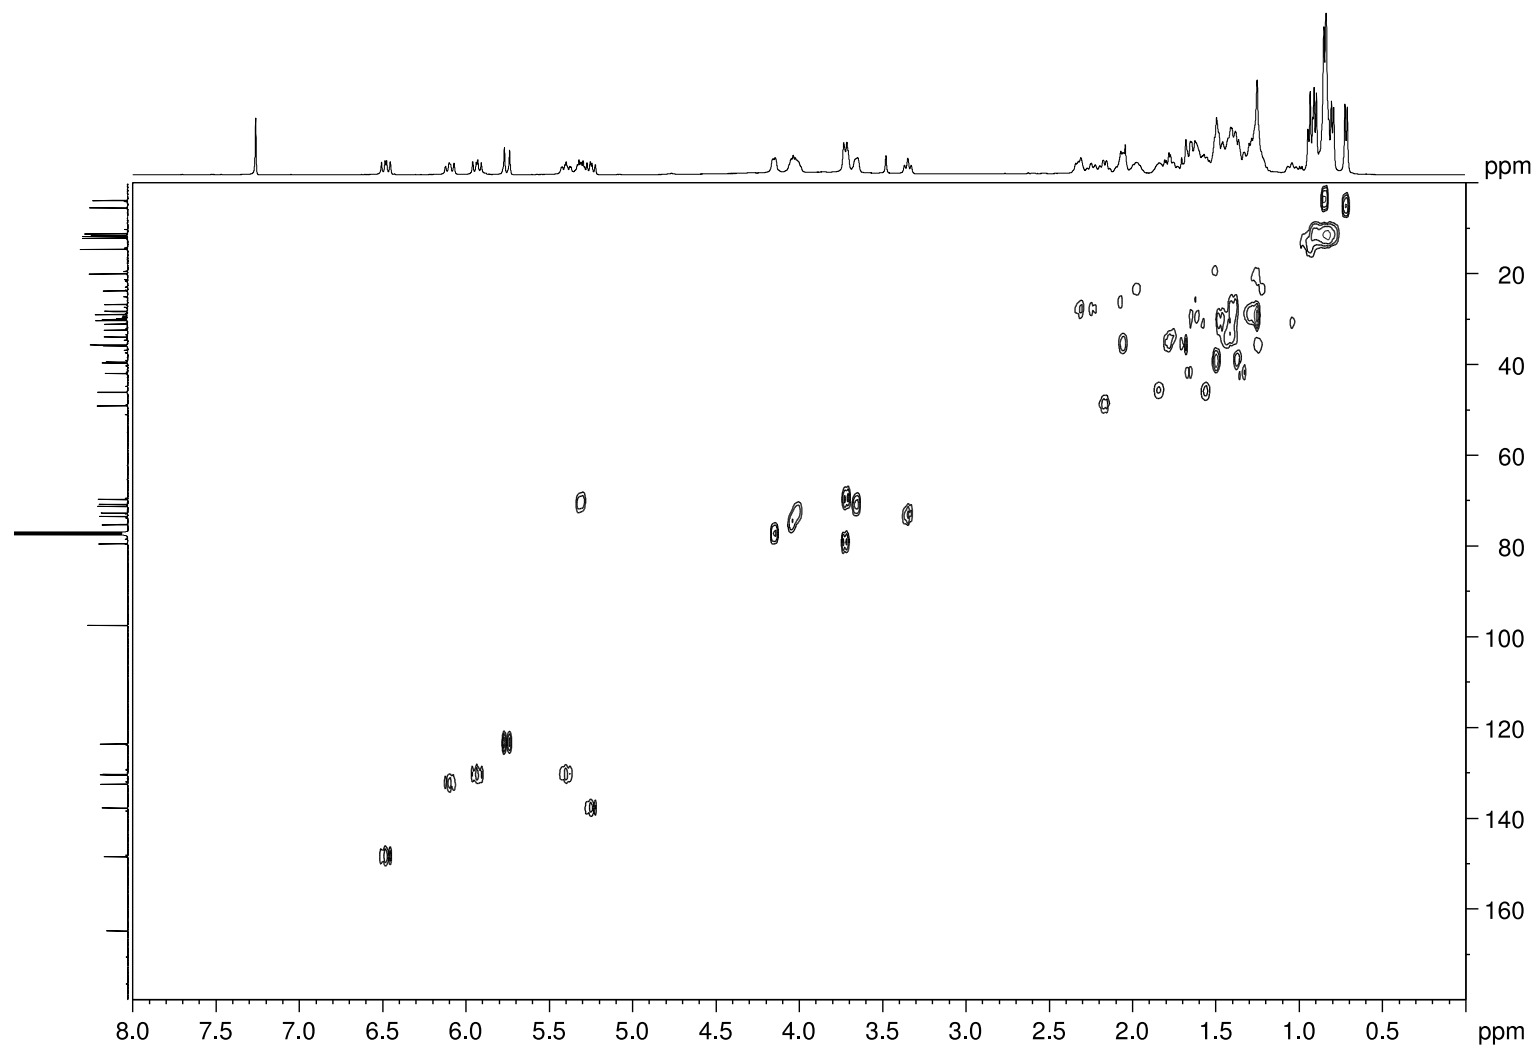



**Figure S29.** HMBC spectrum of **4** (500 MHz, CDCl<sub>3</sub>).

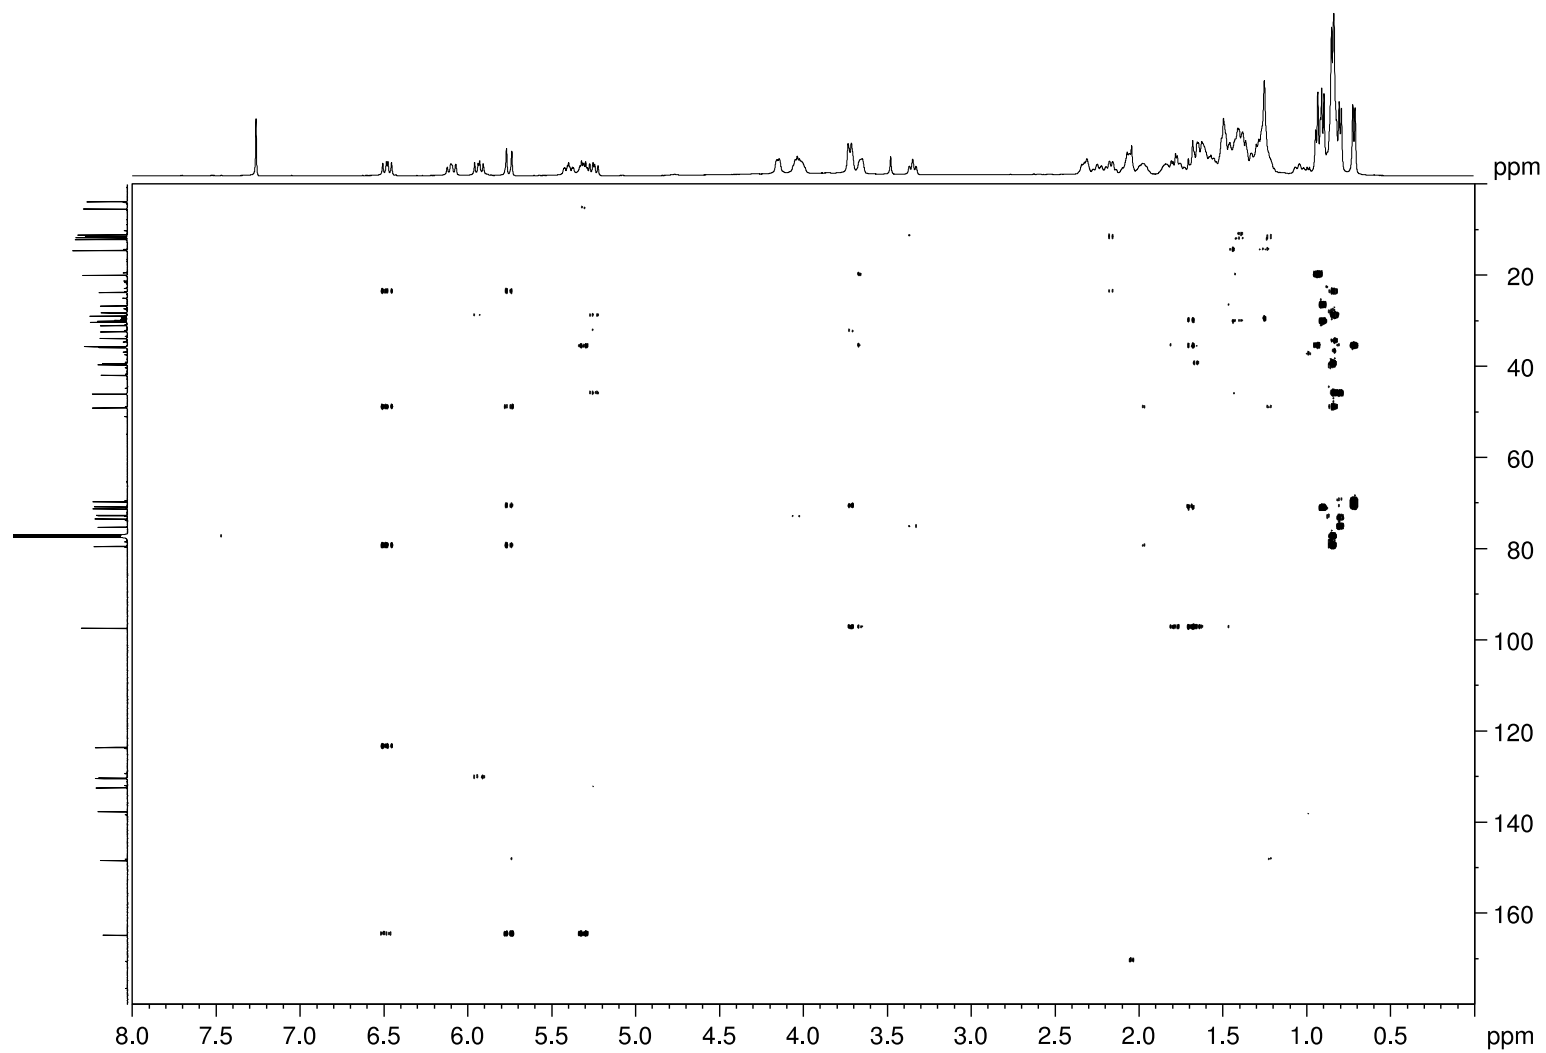



**Figure S30.** NOESY spectrum of **4** (500 MHz, CDCl<sub>3</sub>).

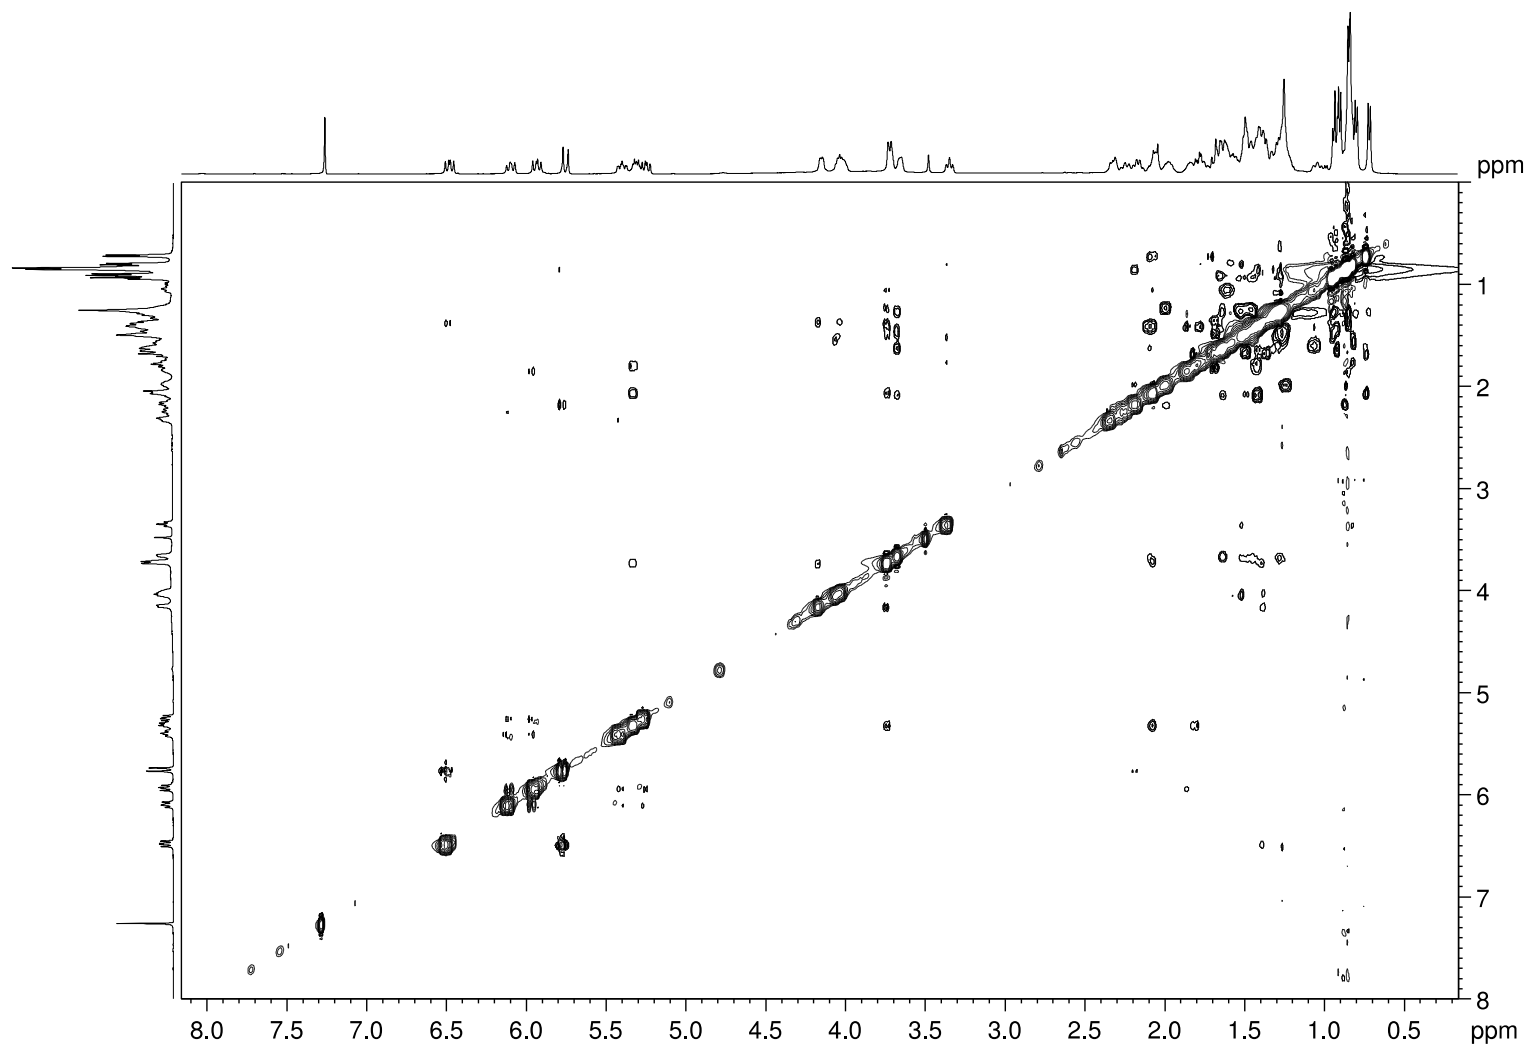



Chemical structures of compounds **3** and **4** are shown, illustrating the assignment of carbon and proton signals using COSY, HMBC, and NOESY correlations.

Legend:

- COSY
- HMBC
- NOESY
